# Supplementary material for: Stepwise assembly and reversible structural transformation of ligated titanium coated bismuth-oxo cores: shell morphology engineering for enhanced chemical fixation of CO2
Source: Royal Society of Chemistry journal article supplement (doi:10.1039/d1sc06847d), 2022-01-01
Supplement: d1sc06847d1.pdf [file d1sc06847d1.pdf]

## *Supporting Information*

### **Stepwise assembly and reversible structural transformation of ligated titanium coated bismuth-oxo cores: shell morphology engineering for enhanced chemical fixation of CO<sub>2</sub>**

Qing-Rong Ding,<sup>a,b</sup> Yinghua Yu,<sup>a</sup> Changsheng Cao,<sup>a</sup> Jian Zhang<sup>a</sup> and Lei Zhang<sup>\*a</sup>

<sup>a</sup> State Key Laboratory of Structural Chemistry, Fujian Institute of Research on the Structure of Matter, Chinese Academy of Sciences, Fuzhou, Fujian 350002, P. R. China.

<sup>b</sup> University of Chinese Academy of Sciences, Chinese Academy of Sciences, Beijing 100049, China

E-mail: [LZhang@fjirsm.ac.cn](mailto:LZhang@fjirsm.ac.cn)

**Materials and Methods.** All reagents and solvents employed are commercially available and are used as received without further purification. Bismuth subsalicylate was bought from Alfa Aesar.  $\text{Ti}(\text{O}^i\text{Pr})_4$  (96%) was bought from Admas-beta. Salicylic acid, piperazine, cis-4-cyclohexene-1,2-dicarboxylic acid, di(trimethylolpropane), 2,2'-biphenol, epichlorohydrin, propylene oxide, 1,2-epoxybutane, styrene oxide, cyclohexene oxide, dibromomethane and chloroform-d were bought from Energy Chemical. The phase purity of products was confirmed by PXRD using a Rigaku Dmax2500 diffractometer with Cu  $K\alpha$  radiation ( $\lambda = 1.54056 \text{ \AA}$ ) with a step size of  $5^\circ/\text{min}$ . Thermogravimetric analyses (TGA) were performed using a NETSCHZ STA-449C thermoanalyzer with a heating rate of  $10^\circ\text{C}/\text{min}$  under a nitrogen atmosphere. Fourier transform infrared (FT-IR) spectra were recorded with a Spectrum One FT-IR Spectrometer in the  $400\text{-}4000 \text{ cm}^{-1}$  range. The UV-vis diffuse reflection data were recorded at room temperature using a powder sample with  $\text{BaSO}_4$  as a standard on a Perkin-Elmer Lambda950 UV-vis spectrophotometer and scanned at 200-800 nm in the reflectance mode with application of the Kubelka-Munk equation,  $(F(R) = (1-R)^2/2R)$ ,<sup>1</sup> where  $R$  representing the reflectance. The solution-state UV-vis absorption spectra of nanoclusters before and after catalytic reaction were recorded using a Perkin-Elmer Lambda365 with 1 nm/s scan rate and scanned at 200-800 nm. The elemental analyses were performed on an EA1110 CHNS-0 CE elemental analyzer. The energy dispersive spectroscopy (EDS) analyses of single crystals were performed on a JEOL JSM6700F field-emission scanning electron microscope equipped with an Oxford INCA system. Inductively coupled plasma (ICP) analyses for Bi and Ti were conducted on an Ultima2 spectrometer. Routine  $^1\text{H}$  NMR spectra were recorded on a Bruker AVANCE III (400 MHz for  $^1\text{H}$  NMR).

**Photocurrent measurement.** Films of compounds were prepared by the solution coating method. The crystals (5 mg) were placed in 0.5 mL isopropanol and 10  $\mu\text{L}$  Nafion (5 wt.%) mixed solvent, then the mixture was ultrasonicated for 30 min to achieve a homogeneous ink. The 50  $\mu\text{L}$  solutions were transferred by pipette and then dropped on the cleaned FTO glass ( $1.5 \times 4.0 \text{ cm}^2$ ,  $50 \Omega$  per square cm). The coating film was obtained after evaporation under ambient atmosphere. A 300 W (PLS-SXE300D) Xe lamp with a 420 nm cutoff filter, located 20 cm away from the surface of the FTO electrode, was employed as light source. The photocurrent experiments were performed on a CHI 760e electrochemical workstation (Chenhua, Shanghai, China) in a three-electrode system, with the sample coated FTO glass ( $1.0 \text{ cm} \times 1.0 \text{ cm}$ ) as the working electrode, a Pt plate as the auxiliary electrode and an Ag/AgCl electrode as the reference electrode. 40ml aqueous solution of  $\text{Na}_2\text{SO}_4$  ( $0.2 \text{ mol L}^{-1}$ ) was used as the electrolyte solution first. All the tests were performed at the same bias potential of +0.8 V. The lamp was kept on continuously, and a manual shutter was used to block exposure of the sample to the light.

**Catalytic reaction.** In each reaction, 10 mmol epoxide substrate, 0.005 mmol catalysts, and 1mmol tetra-*n*-tert-butylammonium bromide (TBAB) were mixed in a 25 mL Schlenk tube. The Schlenk tube was solvent-free and purged with 1 atm  $\text{CO}_2$  at room temperature for 24 h or 48 h with 550 rpm stirring. After reaction, the products were collected and analyzed by  $^1\text{H}$  NMR (400 MHz,  $\text{CDCl}_3$ ) to study its conversion ratio using dibromomethane as an internal standard. The mixed solution after reaction was added to a large amount of ethanol, and further centrifuged to isolate the spent catalyst, which was washed with ethanol several times. After that, the catalyst was reintroduced into the system to restart a new recycle reaction or other characterization.

**Synthesis of  $[\text{Ti}_6\text{Bi}_{38}\text{O}_{45}(\text{SAC})_{18}(\text{HSAC})_{12}] \cdot 2(\text{H}_2\text{O}) \cdot 4(\text{NBA}) \cdot 11(\text{DMF})$  (PTC-281)**

Bismuth subsalicylate (0.362 g, 1.0 mmol), salicylic acid (0.138 g, 1.0 mmol), dimethylformamide (4 ml) and 1-butanol (4 ml) were mixed at room temperature and then dropwise  $\text{Ti}(\text{O}^i\text{Pr})_4$  (0.5 ml, 1.6 mmol) was added. The resultant solution was heated at  $80^\circ\text{C}$  for three days in a glass vial with a polyethylene

screw cap, and then cooled to room temperature, yellow rodlike crystals of PTC-281 were obtained (yield: ~60% based on  $\text{Ti}(\text{O}^i\text{Pr})_4$ ). EA (%) calculated for  $\text{C}_{259}\text{H}_{253}\text{N}_{11}\text{O}_{152}\text{Ti}_6\text{Bi}_{38}$  (14180.26): C, 21.94; H, 1.80; N, 1.09. Found: C, 21.65; H, 1.62; N, 1.21. FT-IR (KBr pellet,  $\text{cm}^{-1}$ ): 3446(w) 2952(w) 1595(s) 1453(s) 1375(s) 1347(s) 1243(m) 1137(m) 1041(w) 890(m) 829(w) 758(m) 706(w) 669(w) 640(w) 546(s).

#### Synthesis of $\text{H}_2[\text{Ti}_{14}\text{Bi}_{38}\text{O}_{50}(\text{SAC})_{30}(\text{EtO})_{12}] \cdot 12(\text{DMF})$ (PTC-282)

PTC-281 (0.200 g), salicylic acid (0.276 g, 2.0 mmol), piperazine (0.086 g, 0.1 mmol), dimethylformamide (4 ml) and ethyl acetate (4 ml) were mixed at room temperature and then dropwise  $\text{Ti}(\text{O}^i\text{Pr})_4$  (0.5 ml, 1.6 mmol) was added. The resultant solution was heated at 80 °C for one night in a glass vial with a polyethylene screw cap, and then cooled to room temperature, yellow block crystals of PTC-282 were obtained. EA (%) calculated for  $\text{C}_{270}\text{H}_{266}\text{N}_{12}\text{O}_{164}\text{Ti}_{14}\text{Bi}_{38}$  (14914.37): C, 21.74; H, 1.80; N, 1.13. Found: C, 21.87; H, 1.64; N, 1.23. FT-IR (KBr pellet,  $\text{cm}^{-1}$ ): 1648(s) 1595(s) 1533(w) 1455(s) 1344(s) 1239(m) 1140(w) 1103(w) 1099(w) 1032(w) 887(m) 834(m) 763(m) 706(w) 672(w) 639(w) 589(w) 456(w).

#### Synthesis of $[\text{Ti}_{16}\text{Bi}_{38}\text{O}_{51}(\text{SAC})_{28}(\text{HSAC})_2(\text{DEA})_4(\text{PhO})_{10}] \cdot 2(\text{CH}_3\text{CN})$ (PTC-283)

PTC-281 (0.200 g), salicylic acid (0.138 g, 2.0 mmol), acetonitrile (4 ml) and phenol (4 ml) were mixed at room temperature and then diethanolamine (30  $\mu\text{L}$ , 0.3 mmol),  $\text{Ti}(\text{O}^i\text{Pr})_4$  (0.5 ml, 1.6 mmol) were added. The resultant solution was heated at 80 °C for one night in a glass vial with a polyethylene screw cap, and then cooled to room temperature, yellow block crystals of PTC-283 were obtained. EA (%) calculated for  $\text{C}_{290}\text{H}_{210}\text{N}_6\text{O}_{159}\text{Ti}_{16}\text{Bi}_{38}$  (15030.27): C, 23.17; H, 1.41; N, 0.56. Found: C, 23.31; H, 1.34; N, 0.63. FT-IR (KBr pellet,  $\text{cm}^{-1}$ ): 1642(w) 1597(s) 1533(w) 1455(s) 1344(s) 1236(m) 1140(w) 1103(w) 1033(w) 892(m) 838(m) 759(w) 706(w) 680(w) 643(w) 527(w) 456(w).

#### Synthesis of $[\text{Ti}_{16}\text{Bi}_{38}\text{O}_{44}(\text{SAC})_{34}(\text{DPC})_6(\text{PhO})_8] \cdot 4(\text{CH}_3\text{CN})$ (PTC-284)

PTC-281 (0.200 g), salicylic acid (0.138 g, 2.0 mmol), cis-4-cyclohexene-1,2-dicarboxylic acid (0.068 g, 0.4 mmol), acetonitrile (4 ml) and phenol (4 ml) were mixed at room temperature and then dropwise  $\text{Ti}(\text{O}^i\text{Pr})_4$  (0.5 ml, 1.6 mmol) was added. The resultant solution was heated at 80 °C for one night in a glass vial with a polyethylene screw cap, and then cooled to room temperature, red spininess crystals of PTC-284 were obtained. EA (%) calculated for  $\text{C}_{342}\text{H}_{236}\text{N}_4\text{O}_{178}\text{Ti}_{16}\text{Bi}_{38}$  (15956.97): C, 25.74; H, 1.49; N, 0.35. Found: C, 25.81; H, 1.40; N, 0.28. FT-IR (KBr pellet,  $\text{cm}^{-1}$ ): 1642(w) 1597(s) 1575(s) 1522(w) 1455(s) 1343(m) 1236(s) 1140(w) 1028(w) 892(m) 838(m) 759(m) 705(w) 672(w) 643(w) 585(w) 527(w).

#### Synthesis of $[\text{Ti}_{18}\text{Bi}_{38}\text{O}_{50}(\text{SAC})_{24}(\text{DTPP})_6(\text{DMT})_6][\text{O}^i\text{Pr}]_2 \cdot 12(\text{DMF})$ (PTC-285)

PTC-281 (0.200 g), salicylic acid (0.138 g, 2.0 mmol), di(trimethylolpropane) (0.250 g, 2.0 mmol), 2,2'-biphenol (0.068 g, 0.4 mmol), dimethylformamide (4 ml) and n-propanol (4 ml) were mixed at room temperature and then dropwise  $\text{Ti}(\text{O}^i\text{Pr})_4$  (0.5 ml, 1.6 mmol) was added. The resultant solution was heated at 80 °C for one night in a glass vial with a polyethylene screw cap, and then cooled to room temperature, orange cube crystals of PTC-285 were obtained. EA (%) calculated for  $\text{C}_{354}\text{H}_{374}\text{N}_{12}\text{O}_{178}\text{Ti}_{18}\text{Bi}_{38}$  (16444.38): C, 25.85; H, 2.29; N, 1.02. Found: C, 25.78; H, 2.30; N, 1.12. FT-IR (KBr pellet,  $\text{cm}^{-1}$ ): 1605(s) 1579(s) 1575(s) 1543(w) 1460(s) 1348(s) 1277(w) 1244(s) 1140(m) 1079(s) 1031(w) 957(w) 892(m) 834(m) 706(w) 676(w) 643(w) 539(w) 457(w).

#### Synthesis of $\text{H}_2[\text{Ti}_{20}\text{Bi}_{38}\text{O}_{50}(\text{SAC})_{30}(\text{DTPP})_6(\text{CH}_3\text{O})_{12}] \cdot 4(\text{DMF})$ (PTC-286)

PTC-281 (0.200 g), salicylic acid (0.138 g, 2.0 mmol), di(trimethylolpropane) (0.250 g, 2.0 mmol), dimethylformamide (4 ml) and methanol (4 ml) were mixed at room temperature and then dropwise  $\text{Ti}(\text{O}^i\text{Pr})_4$  (0.5 ml, 1.6 mmol) was added. The resultant solution was heated at 80 °C for one night in a glass vial with a polyethylene screw cap, and then cooled to room temperature, yellow block crystals of

PTC-286 were obtained. EA (%) calculated for  $C_{306}H_{318}N_4O_{186}Ti_{20}Bi_{38}$  (15926.30): C, 23.08; H, 2.02; N, 0.35. Found: C, 23.22; H, 2.11; N, 0.43. FT-IR (KBr pellet,  $cm^{-1}$ ): 3427(w) 3066(w) 2960(w) 2855(w) 1600(s) 1579(s) 1547(w) 1460(s) 1343(s) 1238(m) 1140(m) 1079(w) 1028(w) 954(w) 892(m) 834(m) 706(w) 676(w) 643(w) 539(w) 457(w).

**General Methods for X-ray Crystallography.** Crystallographic data of PTC-281 to 286 were collected on ROD diffractometer which is equipped with a gallium micro-focus metaljet X-ray sources ( $\lambda = 1.3405 \text{ \AA}$ ) at 100 K. The structures were solved with the dual-direct methods using *ShelxT* and refined with the full-matrix least-squares technique based on  $F^2$  using the *SHELXL-2014*<sup>2</sup> program package and Olex-2<sup>3</sup> software. Non-hydrogen atoms were refined anisotropically, and all hydrogen atoms bond C were generated geometrically. Some disordered solvent molecules are removed by using the SQUEEZE<sup>4</sup> routine of PLATON.<sup>5</sup> The details of the SQUEEZE corrections, including the volume of void space and electron counts, are provided in the cif file. The cluster core of PTC-285 is a +2 cation. According to the reactants added in the synthesis of PTC-285 and also the elemental analysis results, we speculate that the peripheral counter anions are two free O<sup>i</sup>Pr groups in the cavity. Unfortunately, due to the weak diffraction, these counter anions could not be crystallographically defined. The X-ray crystallographic coordinates for structures reported in this article have been deposited at the Cambridge Crystallographic Data Centre (CCDC) under deposition numbers CCDC 2104507, 2104508, and 2104511 to 2104515 for PTC-281, PTC-281R, and PTC-282 to PTC-286. These data can be obtained free of charge from the Cambridge Crystallographic Data Centre via [http://www.ccdc.cam.ac.uk/data\\_request/cif](http://www.ccdc.cam.ac.uk/data_request/cif).

- (1) W. W. Wendlandt, H. G. Hecht, *Interscience publishers: New York*, 1966, 46, 593.
- (2) D. Leggas, O. V. Tsodikov, *Acta Crystallogr A Found Adv.* 2015, 71, 319-324.
- (3) O. V. Dolomanov, L. J. Bourhis, R. J. Gildea, J. A. K Howard, H. Puschmann, *J. Appl. Crystallogr.* 2009, 42, 339-341.
- (4) A. L. Spek, *Acta Crystallogr C Struct Chem.* 2015, 71, 9-18.
- (5) A. L. Spek, *Acta Crystallogr. D Biol. Crystallogr.* 2009, 65, 148-155.

**Table S1.** Crystallographic data and structure refinement summary for PTC-281 and PTC-282

|                                                                                         | PTC-281                                                                                             | PTC-281R                                                                                            | PTC-282                                                                                             |
|-----------------------------------------------------------------------------------------|-----------------------------------------------------------------------------------------------------|-----------------------------------------------------------------------------------------------------|-----------------------------------------------------------------------------------------------------|
| Cryst. formula                                                                          | C <sub>254</sub> H <sub>244</sub> N <sub>11</sub> O <sub>149</sub> Ti <sub>6</sub> Bi <sub>38</sub> | C <sub>240</sub> H <sub>202</sub> N <sub>10</sub> O <sub>145</sub> Ti <sub>6</sub> Bi <sub>38</sub> | C <sub>252</sub> H <sub>222</sub> N <sub>6</sub> O <sub>158</sub> Ti <sub>14</sub> Bi <sub>38</sub> |
| M <sub>r</sub>                                                                          | 14063.23                                                                                            | 13774.74                                                                                            | 14474.18                                                                                            |
| T/K                                                                                     | 100.4(7)                                                                                            | 104.2(3)                                                                                            | 99.97(11)                                                                                           |
| Crystal system                                                                          | Triclinic                                                                                           | Monoclinic                                                                                          | Trigonal                                                                                            |
| Space group                                                                             | <i>P</i> -1                                                                                         | <i>C</i> 2/ <i>c</i>                                                                                | <i>R</i> -3 <i>c</i>                                                                                |
| <i>a</i> /Å                                                                             | 23.6421(2)                                                                                          | 31.6643(3)                                                                                          | 24.8265(5)                                                                                          |
| <i>b</i> /Å                                                                             | 23.6421(2)                                                                                          | 33.3838(3)                                                                                          | 24.8265(5)                                                                                          |
| <i>c</i> /Å                                                                             | 38.8128(3)                                                                                          | 35.4595(3)                                                                                          | 120.4773(15)                                                                                        |
| α (°)                                                                                   | 107.5720(10)                                                                                        | 90                                                                                                  | 90                                                                                                  |
| β (°)                                                                                   | 91.1110(10)                                                                                         | 91.5690(10)                                                                                         | 90                                                                                                  |
| γ (°)                                                                                   | 114.4930(10)                                                                                        | 90                                                                                                  | 120                                                                                                 |
| V/Å <sup>3</sup>                                                                        | 18711.2(3)                                                                                          | 37469.3(6)                                                                                          | 64308(3)                                                                                            |
| Z                                                                                       | 2                                                                                                   | 4                                                                                                   | 6                                                                                                   |
| Dc/mg m <sup>-3</sup>                                                                   | 2.496                                                                                               | 2.442                                                                                               | 2.242                                                                                               |
| μ/mm <sup>-1</sup>                                                                      | 25.023                                                                                              | 24.973                                                                                              | 22.612                                                                                              |
| Indep reflns<br>[ <i>I</i> > 2σ( <i>I</i> )]                                            | 64356                                                                                               | 33048                                                                                               | 12593                                                                                               |
| F(000)                                                                                  | 12646.0                                                                                             | 24632.0                                                                                             | 39012.0                                                                                             |
| GOF                                                                                     | 1.072                                                                                               | 1.029                                                                                               | 1.069                                                                                               |
| CCDC No.                                                                                | 2104507                                                                                             | 2104508                                                                                             | 2104511                                                                                             |
| R <sub>1</sub> <sup>a</sup> , wR <sub>2</sub> <sup>b</sup> [ <i>I</i> > 2σ( <i>I</i> )] | 0.0493, 0.1277                                                                                      | 0.0866, 0.2288                                                                                      | 0.0831, 0.2302                                                                                      |
| R <sub>1</sub> <sup>a</sup> , wR <sub>2</sub> <sup>b</sup> (all data)                   | 0.0602, 0.1333                                                                                      | 0.0946, 0.2414                                                                                      | 0.0966, 0.2439                                                                                      |

$${}^aR_1 = \Sigma(|F_o| - |F_c|) / \Sigma|F_o|. \quad {}^b wR_2 = [\Sigma w(|F_o|^2 - |F_c|^2)^2 / \Sigma w(F_o^2)]^{1/2}.$$

**Table S2.** Crystallographic data and structure refinement summary for PTC-283 to PTC-285

|                                                                        | PTC-283                                                                                             | PTC-284                                                                                             | PTC-285                                                                              |
|------------------------------------------------------------------------|-----------------------------------------------------------------------------------------------------|-----------------------------------------------------------------------------------------------------|--------------------------------------------------------------------------------------|
| Cryst. formula                                                         | C <sub>290</sub> H <sub>210</sub> N <sub>6</sub> O <sub>159</sub> Ti <sub>16</sub> Bi <sub>38</sub> | C <sub>342</sub> H <sub>236</sub> N <sub>4</sub> O <sub>178</sub> Ti <sub>16</sub> Bi <sub>38</sub> | C <sub>312</sub> H <sub>276</sub> O <sub>164</sub> Ti <sub>18</sub> Bi <sub>38</sub> |
| M <sub>r</sub>                                                         | 15030.27                                                                                            | 15956.97                                                                                            | 15452.75                                                                             |
| T/K                                                                    | 110.01(10)                                                                                          | 100.00(14)                                                                                          | 100.01(11)                                                                           |
| Crystal system                                                         | Monoclinic                                                                                          | Monoclinic                                                                                          | Trigonal                                                                             |
| Space group                                                            | <i>P2<sub>1</sub>/n</i>                                                                             | <i>I2/a</i>                                                                                         | <i>R-3</i>                                                                           |
| a/Å                                                                    | 22.5953(2)                                                                                          | 25.2403(1)                                                                                          | 39.6442(16)                                                                          |
| b/Å                                                                    | 37.4685(3)                                                                                          | 43.6932(2)                                                                                          | 39.6442(16)                                                                          |
| c/Å                                                                    | 23.2719(2)                                                                                          | 49.0721(3)                                                                                          | 23.6456(15)                                                                          |
| α (°)                                                                  | 90                                                                                                  | 90                                                                                                  | 90                                                                                   |
| β (°)                                                                  | 98.1640(10)                                                                                         | 96.6720(10)                                                                                         | 90                                                                                   |
| γ (°)                                                                  | 90                                                                                                  | 90                                                                                                  | 120                                                                                  |
| V/Å <sup>3</sup>                                                       | 19502.6(3)                                                                                          | 53751.6(5)                                                                                          | 32184(3)                                                                             |
| Z                                                                      | 2                                                                                                   | 4                                                                                                   | 3                                                                                    |
| Dc/mg m <sup>-3</sup>                                                  | 2.559                                                                                               | 1.972                                                                                               | 2.392                                                                                |
| μ/mm <sup>-1</sup>                                                     | 25.087                                                                                              | 18.253                                                                                              | 23.008                                                                               |
| indep<br>[I > 2σ(I)]                                                   | reflns 34364                                                                                        | 46869                                                                                               | 12486                                                                                |
| F(000)                                                                 | 13540.0                                                                                             | 28984.0                                                                                             | 21030.0                                                                              |
| GOF                                                                    | 1.044                                                                                               | 1.018                                                                                               | 1.217                                                                                |
| CCDC No.                                                               | 2104512                                                                                             | 2104513                                                                                             | 2104514                                                                              |
| R <sub>1</sub> <sup>a</sup> , wR <sub>2</sub> <sup>b</sup> [I > 2σ(I)] | 0.0635, 0.1590                                                                                      | 0.0669, 0.1720                                                                                      | 0.1020, 0.3013                                                                       |
| R <sub>1</sub> <sup>a</sup> , wR <sub>2</sub> <sup>b</sup> (all data)  | 0.0798, 0.1733                                                                                      | 0.0896, 0.1947                                                                                      | 0.1275, 0.3285                                                                       |

$${}^aR_1 = \Sigma(|F_o| - |F_c|) / \Sigma|F_o|. \quad {}^b wR_2 = [\Sigma w(|F_o|^2 - |F_c|^2)^2 / \Sigma w(F_o^2)]^{1/2}.$$

**Table S3.** Crystallographic data and structure refinement summary for PTC-286

| PTC-286                                                                                 |                                                                                                     |
|-----------------------------------------------------------------------------------------|-----------------------------------------------------------------------------------------------------|
| Cryst. formula                                                                          | C <sub>306</sub> H <sub>304</sub> N <sub>4</sub> O <sub>186</sub> Ti <sub>20</sub> Bi <sub>38</sub> |
| M <sub>r</sub>                                                                          | 15912.75                                                                                            |
| T/K                                                                                     | 100.01(10)                                                                                          |
| Crystal system                                                                          | Triclinic                                                                                           |
| Space group                                                                             | <i>P</i> -1                                                                                         |
| a/Å                                                                                     | 23.1533(5)                                                                                          |
| b/Å                                                                                     | 23.5480(5)                                                                                          |
| c/Å                                                                                     | 23.6018(5)                                                                                          |
| α (°)                                                                                   | 117.688(2)                                                                                          |
| β (°)                                                                                   | 115.545(2)                                                                                          |
| γ (°)                                                                                   | 92.2502(17)                                                                                         |
| V/Å <sup>3</sup>                                                                        | 9807.4(4)                                                                                           |
| Z                                                                                       | 1                                                                                                   |
| Dc/mg m <sup>-3</sup>                                                                   | 2.694                                                                                               |
| μ/mm <sup>-1</sup>                                                                      | 25.420                                                                                              |
| indep reflns<br>[ <i>I</i> > 2σ( <i>I</i> )]                                            | 34316                                                                                               |
| F(000)                                                                                  | 7250.0                                                                                              |
| GOF                                                                                     | 1.037                                                                                               |
| CCDC No.                                                                                | 2104515                                                                                             |
| R <sub>1</sub> <sup>a</sup> , wR <sub>2</sub> <sup>b</sup> [ <i>I</i> > 2σ( <i>I</i> )] | 0.0632, 0.1615                                                                                      |
| R <sub>1</sub> <sup>a</sup> , wR <sub>2</sub> <sup>b</sup> (all data)                   | 0.0936, 0.1971                                                                                      |

$${}^a R_1 = \Sigma(|F_o| - |F_c|) / \Sigma|F_o|. \quad {}^b wR_2 = [\Sigma w(|F_o|^2 - |F_c|^2)^2 / \Sigma w(F_o^2)]^{1/2}.$$

**Table S4. Bond valence sum (BVS) analysis of titanium and bridged oxygen atoms<sup>[a]</sup> for PTC-281 to 286**

| PTC-281   |             |       |           |             |       |            |             |       |
|-----------|-------------|-------|-----------|-------------|-------|------------|-------------|-------|
| Ti1 4.255 |             |       | Ti2 4.231 |             |       | Ti3 4.315  |             |       |
| Ti1-O030  | d=1.997(12) | 0.611 | Ti2-O037  | d=2.010(11) | 0.590 | Ti3-O02D   | d=2.041(10) | 0.542 |
| Ti1-O03B  | d=2.014(12) | 0.584 | Ti2-O03S  | d=1.976(11) | 0.647 | Ti3-O02E   | d=1.890(10) | 0.816 |
| Ti1-O03C  | d=2.025(12) | 0.566 | Ti2-O047  | d=1.905(12) | 0.784 | Ti3-O02J   | d=1.992(9)  | 0.619 |
| Ti1-O03N  | d=1.890(14) | 0.816 | Ti2-O04G  | d=2.012(11) | 0.587 | Ti3-O02W   | d=1.861(10) | 0.883 |
| Ti1-O03X  | d=1.891(12) | 0.814 | Ti2-O04K  | d=1.893(12) | 0.809 | Ti3-O02X   | d=1.871(11) | 0.859 |
| Ti1-O04I  | d=1.869(13) | 0.864 | Ti2-O04U  | d=1.891(12) | 0.814 | Ti3-O032   | d=2.006(9)  | 0.596 |
| Ti4 4.280 |             |       | Ti5 4.283 |             |       | Ti6 4.264  |             |       |
| Ti4-O03Z  | d=1.988(12) | 0.626 | Ti5-O02F  | d=2.012(10) | 0.587 | Ti6-O02H   | d=1.988(11) | 0.626 |
| Ti4-O041  | d=1.998(12) | 0.609 | Ti5-O02O  | d=1.858(10) | 0.890 | Ti6-O02K   | d=1.873(13) | 0.854 |
| Ti4-O043  | d=1.884(15) | 0.829 | Ti5-O02S  | d=2.026(10) | 0.565 | Ti6-O02M   | d=2.026(11) | 0.565 |
| Ti4-O044  | d=2.044(12) | 0.538 | Ti5-O02U  | d=1.875(10) | 0.850 | Ti6-O02T   | d=1.891(12) | 0.814 |
| Ti4-O04A  | d=1.866(14) | 0.871 | Ti5-O02Z  | d=2.010(10) | 0.590 | Ti6-O02Y   | d=2.008(12) | 0.593 |
| Ti4-O04M  | d=1.894(14) | 0.807 | Ti5-O03O  | d=1.897(11) | 0.801 | Ti6-O03W   | d=1.892(12) | 0.812 |
| PTC-282   |             |       |           |             |       |            |             |       |
| Ti1 4.716 |             |       | Ti2 4.120 |             |       | Ti3 4.241  |             |       |
| Ti1-O00Q  | d=1.948(19) | 0.663 | Ti2-O00J  | d=1.881(15) | 0.836 | Ti3-O00J   | d=1.827(15) | 0.929 |
| Ti1-O00Q  | d=1.948(19) | 0.663 | Ti2-O00T  | d=2.103(15) | 0.459 | Ti3-O00L=K | d=1.890(17) | 0.779 |
| Ti1-O00Q  | d=1.948(19) | 0.663 | Ti2-O00U  | d=1.955(17) | 0.684 | Ti3-O00L   | d=1.92(2)   | 0.752 |
| Ti1-O00W  | d=1.83(2)   | 0.909 | Ti2-O00X  | d=1.945(19) | 0.703 | Ti3-O00P   | d=2.016(13) | 0.560 |
| Ti1-O00W  | d=1.83(2)   | 0.909 | Ti2-O00Y  | d=1.85(2)   | 0.909 | Ti3-O00V   | d=1.906(16) | 0.590 |
| Ti1-O00W  | d=1.83(2)   | 0.909 | Ti2-O00Z  | d=2.05(2)   | 0.529 | Ti3-O00Z   | d=1.985(16) | 0.631 |
| PTC-283   |             |       |           |             |       |            |             |       |
| Ti1 4.325 |             |       | Ti2 4.181 |             |       | Ti3 4.392  |             |       |
| O00S      | 1.903(11)   | 0.788 | O014      | 1.926(11)   | 0.740 | O016       | 1.876(14)   | 0.848 |
| O00U      | 2.078(11)   | 0.491 | O01D      | 1.948(13)   | 0.698 | O01L       | 1.996(12)   | 0.613 |
| O00Z      | 2.103(11)   | 0.459 | O01P      | 2.015(11)   | 0.582 | O01O       | 2.042(14)   | 0.541 |
| O013      | 1.953(11)   | 0.688 | O01S      | 2.030(14)   | 0.559 | O01R       | 2.002(12)   | 0.603 |
| O01I      | 1.748(12)   | 1.198 | O028      | 1.705(11)   | 1.346 | O02A       | 1.860(14)   | 0.885 |



|           |             |       |           |             |       |           |             |       |
|-----------|-------------|-------|-----------|-------------|-------|-----------|-------------|-------|
| O01J      | 1.946(12)   | 0.701 | N02C      | 2.318(13)   | 0.256 | O02E      | 1.853(15)   | 0.902 |
| Ti4 4.198 |             |       | Ti5 4.446 |             |       | Ti6 4.227 |             |       |
| O02J      | 1.917(16)   | 0.759 | O02P      | 2.054(18)   | 0.524 | O01H      | 2.015(14)   | 0.582 |
| O02Y      | 1.87(2)     | 0.861 | O02Q      | 1.82(2)     | 0.934 | O01W      | 2.023(14)   | 0.569 |
| O03D      | 1.793(19)   | 1.061 | O03D      | 1.930(18)   | 0.679 | O01X      | 1.926(13)   | 0.740 |
| O03K      | 2.031(17)   | 0.557 | O03Q      | 1.83(2)     | 0.909 | O02I      | 1.918(13)   | 0.757 |
| O58       | 1.83(2)     | 0.960 | O048      | 2.122(19)   | 0.414 | O02F      | 1.714(12)   | 1.313 |
|           |             |       | O16       | 1.69(2)     | 0.986 | N02L      | 2.304(15)   | 0.266 |
| Ti7 4.322 |             |       | Ti8 4.232 |             |       |           |             |       |
| O01C      | 1.863(14)   | 0.878 | O01B      | 1.861(14)   | 0.883 |           |             |       |
| O01F      | 1.843(14)   | 0.927 | O01G      | 1.848(13)   | 0.914 |           |             |       |
| O01Q      | 2.024(12)   | 0.568 | O01T      | 1.875(13)   | 0.850 |           |             |       |
| O01Z      | 1.862(14)   | 0.880 | O01U      | 2.038(12)   | 0.547 |           |             |       |
| O023      | 2.067(12)   | 0.506 | O025      | 2.054(12)   | 0.524 |           |             |       |
| O02I      | 2.027(14)   | 0.563 | O02K      | 2.061(13)   | 0.514 |           |             |       |
| PTC-284   |             |       |           |             |       |           |             |       |
| Ti1 4.006 |             |       | Ti2 4.291 |             |       | Ti3 4.330 |             |       |
| Ti1-O01T  | d=1.857(13) | 0.892 | Ti2-O01E  | d=2.070(13) | 0.484 | Ti3-O02C  | d=2.042(12) | 0.541 |
| Ti1-O01V  | d=2.048(12) | 0.165 | Ti2-O01K  | d=2.041(11) | 0.527 | Ti3-O01B  | d=1.848(12) | 0.914 |
| Ti1-O01W  | d=1.971(13) | 0.655 | Ti2-O01L  | d=1.860(13) | 0.854 | Ti3-O02I  | d=2.030(11) | 0.559 |
| Ti1-O01Z  | d=1.863(12) | 0.878 | Ti2-O01M  | d=1.995(12) | 0.595 | Ti3-O029  | d=1.860(12) | 0.885 |
| Ti1-O026  | d=2.051(12) | 0.528 | Ti2-O020  | d=1.879(13) | 0.812 | Ti3-O02H  | d=1.868(14) | 0.866 |
| Ti1-O02P  | d=1.860(14) | 0.885 | Ti2-O02C  | d=1.794(14) | 1.019 | Ti3-O02M  | d=2.026(13) | 0.565 |
| Ti4 4.300 |             |       | Ti5 4.310 |             |       | Ti6 4.334 |             |       |
| Ti4-O018  | d=2.046(12) | 0.535 | Ti5-O00Z  | d=1.848(12) | 0.914 | Ti6-O02Q  | d=2.007(13) | 0.574 |
| Ti4-O01R  | d=1.843(13) | 0.927 | Ti5-O01A  | d=2.082(11) | 0.485 | Ti6-O02Z  | d=1.976(16) | 0.619 |
| Ti4-O024  | d=1.951(13) | 0.692 | Ti5-O01F  | d=1.842(12) | 0.929 | Ti6-O032  | d=1.860(14) | 0.852 |
| Ti4-O027  | d=1.980(11) | 0.640 | Ti5-O01N  | d=1.991(11) | 0.621 | Ti6-O03N  | d=2.073(14) | 0.479 |
| Ti4-O02A  | d=1.855(12) | 0.897 | Ti5-O01Q  | d=1.849(12) | 0.912 | Ti6-O03S  | d=1.821(17) | 0.939 |
| Ti4-O02F  | d=1.998(12) | 0.609 | Ti5-O038  | d=2.111(12) | 0.449 | Ti6-O04R  | d=1.850(16) | 0.871 |
| Ti7 4.290 |             |       | Ti8 3.093 |             |       |           |             |       |

|           |             |       |           |             |       |           |           |       |
|-----------|-------------|-------|-----------|-------------|-------|-----------|-----------|-------|
| Ti7-O02N  | d=2.026(15) | 0.542 | Ti8-O02V  | d=1.983(14) | 0.595 |           |           |       |
| Ti7-O02R  | d=1.887(17) | 0.786 | Ti8-O033  | d=2.011(14) | 0.551 |           |           |       |
| Ti7-O02X  | d=2.056(15) | 0.500 | Ti8-O03I  | d=1.851(17) | 0.850 |           |           |       |
| Ti7-O030  | d=1.989(17) | 0.596 | Ti8-O04U  | d=1.960(15) | 0.633 |           |           |       |
| Ti7-O066  | d=1.85(2)   | 0.861 | Ti8-O05W  | d=2.075(13) | 0.464 |           |           |       |
| Ti7-O3AA  | d=1.795(18) | 1.005 |           |             |       |           |           |       |
| PTC-285   |             |       |           |             |       |           |           |       |
| Ti1 4.719 |             |       | Ti2 4.385 |             |       | Ti3 4.386 |           |       |
| O00P      | 1.96(2)     | 0.640 | O00I      | 1.736(17)   | 1.182 | O00K      | 1.973(16) | 0.624 |
| O00S      | 2.01(2)     | 0.559 | O00J      | 1.854(19)   | 0.854 | O00T      | 1.90(2)   | 0.752 |
| O00V      | 2.053(19)   | 0.499 | O00Q      | 1.866(17)   | 0.832 | O00Y      | 1.994(17) | 0.588 |
| O017      | 1.76(2)     | 1.099 | O00W      | 2.260(18)   | 0.300 | O010      | 1.964(18) | 0.636 |
| O01A      | 1.83(2)     | 0.909 | O00Y      | 1.964(16)   | 0.640 | O011      | 1.88(3)   | 0.773 |
| O0AA      | 1.78(3)     | 1.013 | O010      | 2.001(17)   | 0.577 | O012      | 1.78(3)   | 1.013 |

[a]  $V_i = \sum S_{ij} = \sum \exp[(r_i - r_{ij})/B]$ , where  $r_0$  is the length of a single bond (here  $r_1 = 1.815$  for  $\text{Ti}^{\text{IV}}\text{-O}$ ,  $r_1 = 1.791$  for  $\text{Ti}^{\text{III}}\text{-O}$ ),  $r_i$  is the bond length between atoms  $i$  and  $j$ ;  $B$  is a constant, the “universal parameter”  $\sim 0.37$  Å;  $S_{ij}$  is the valence of a bond between atoms  $i$  and  $j$ ;  $V_i$  is the sum of all bond valences of the bonds formed by a given atom  $i$ .

**Table S5.** The summary of ICP-AES results

|         | Ti (%)     |       | Bi (%)     |       | Ti / Bi    |       |
|---------|------------|-------|------------|-------|------------|-------|
|         | Calculated | Found | Calculated | Found | Calculated | Found |
| PTC-281 | 2.03       | 2.00  | 56.00      | 56.03 | 6          | 6.25  |
| PTC-282 | 4.49       | 4.52  | 53.25      | 52.39 | 14         | 14.31 |
| PTC-283 | 5.10       | 5.04  | 52.84      | 51.53 | 16         | 16.23 |
| PTC-284 | 4.80       | 4.44  | 49.77      | 45.86 | 16         | 16.06 |
| PTC-285 | 5.24       | 5.43  | 48.28      | 49.26 | 18         | 18.29 |
| PTC-286 | 6.01       | 5.88  | 49.86      | 47.87 | 20         | 20.38 |

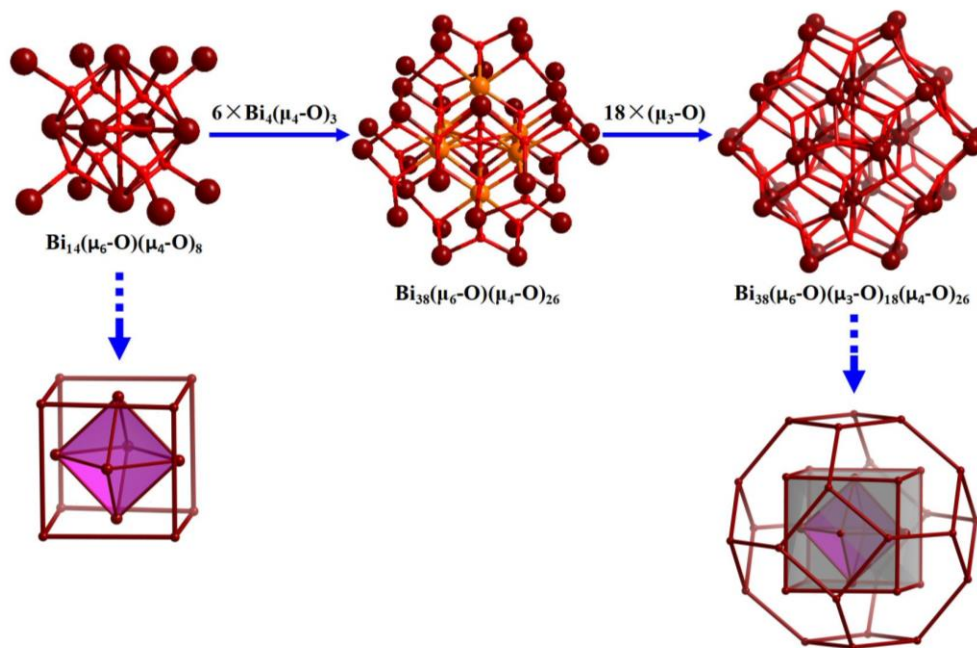

Figure S1. Structural illustration of  $\text{Bi}_{38}\text{O}_{45}$  cluster core in PTC-281.

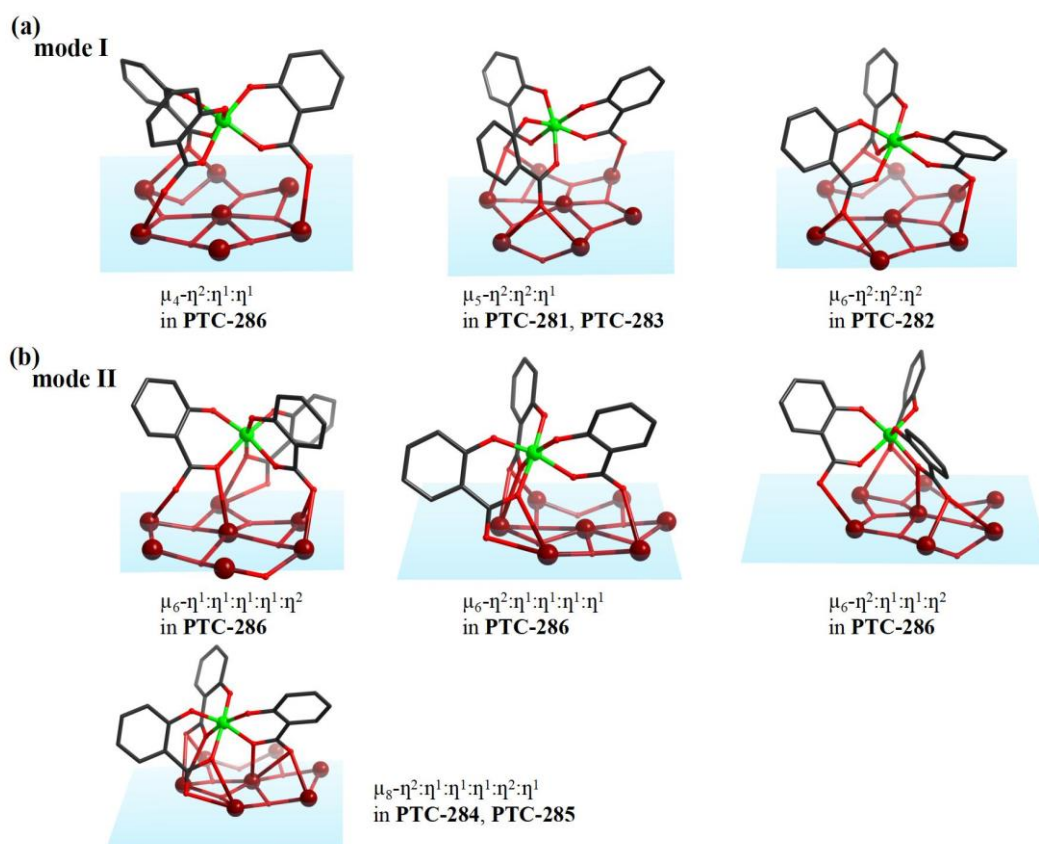

Figure S2. The coordination modes of the  $[\text{Ti}(\text{SAC})_3]$  metalloligands in all complexes.

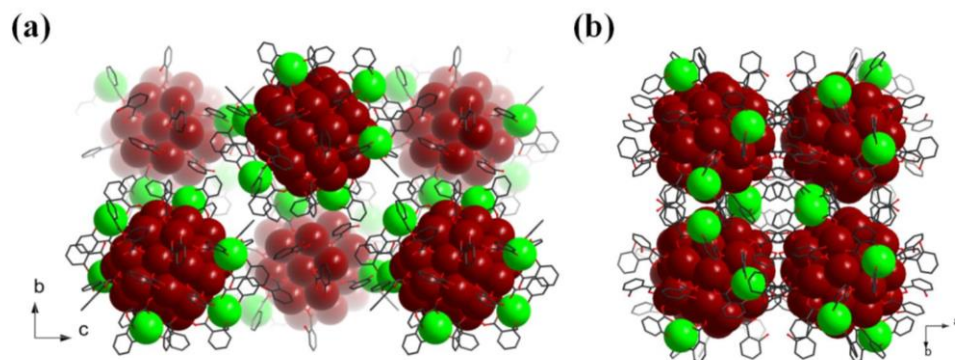

Figure S3. The packing view of PTC-281 along the a and c-axis. All the H atoms are omitted for clarity. Color codes: green Ti; dark red Bi; black C; red O.

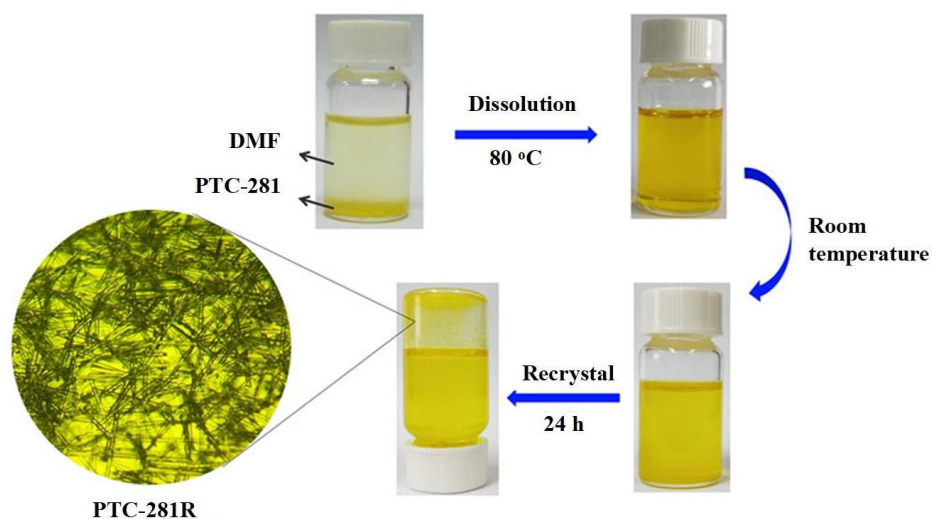

Figure S4. Illustration of the recrystallization process of PTC-281 to generate PTC-281R. 50 mg PTC-281 and 4 ml DMF were mixed at room temperature, then the resultant solution was heated at 80 °C for 24 h to get a yellow solution. After cooling to room temperature, yellow rod-like crystals were obtained in one day.

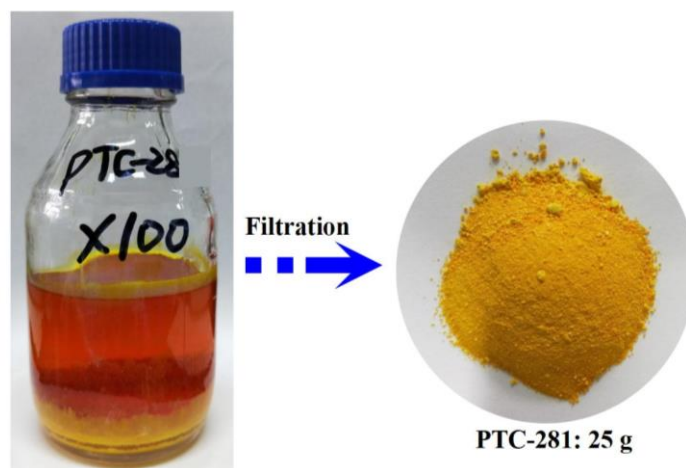

Figure S5. Scaling up synthesis of PTC-281. Bismuth subsalicylate (36.2 g), salicylic acid (13.8 g), dimethylformamide (150 ml) and 1-butanol (150 ml) were mixed at room temperature and then dropwise  $\text{Ti}(\text{O}^i\text{Pr})_4$  (10 ml) was added. The resultant solution was heated at 80 °C for three days, yellow rod-like crystals of PTC-281 were obtained.

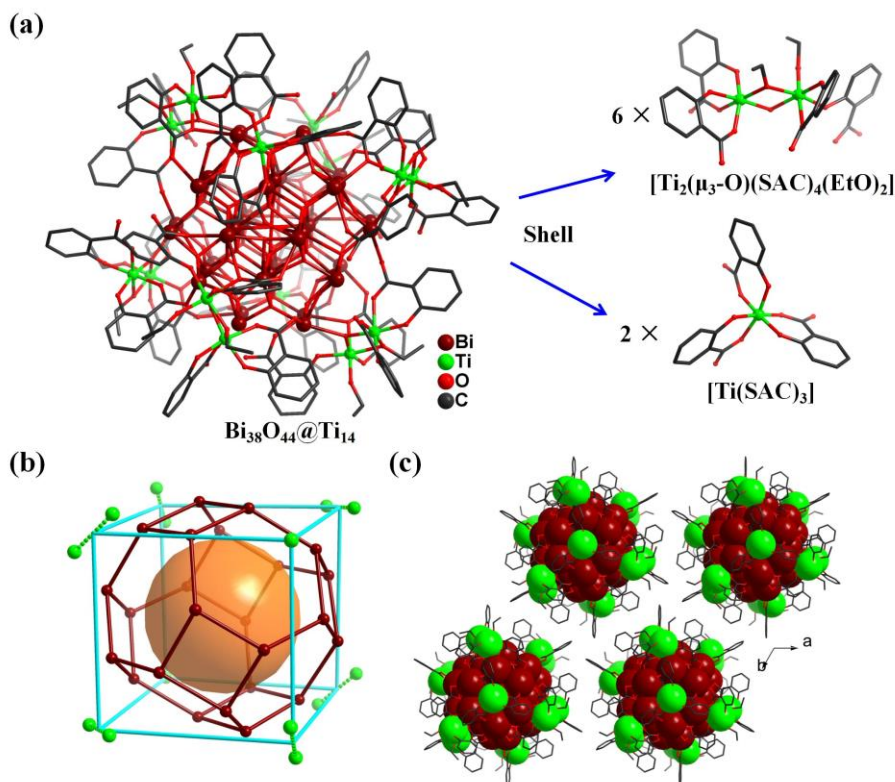

**Figure S6.** (a) The core-shell structure of PTC-282, the shell is made up of six  $[\text{Ti}_2(\mu_3\text{-O})(\text{SAC})_4(\text{EtO})_2]$  units and two  $[\text{Ti}(\text{SAC})_3]$  metalloligands; (b) fourteen titanium atoms form a square cage; (c) the packing view of PTC-282 along the c-axis. Color codes: green Ti; dark red Bi; black C; red O.

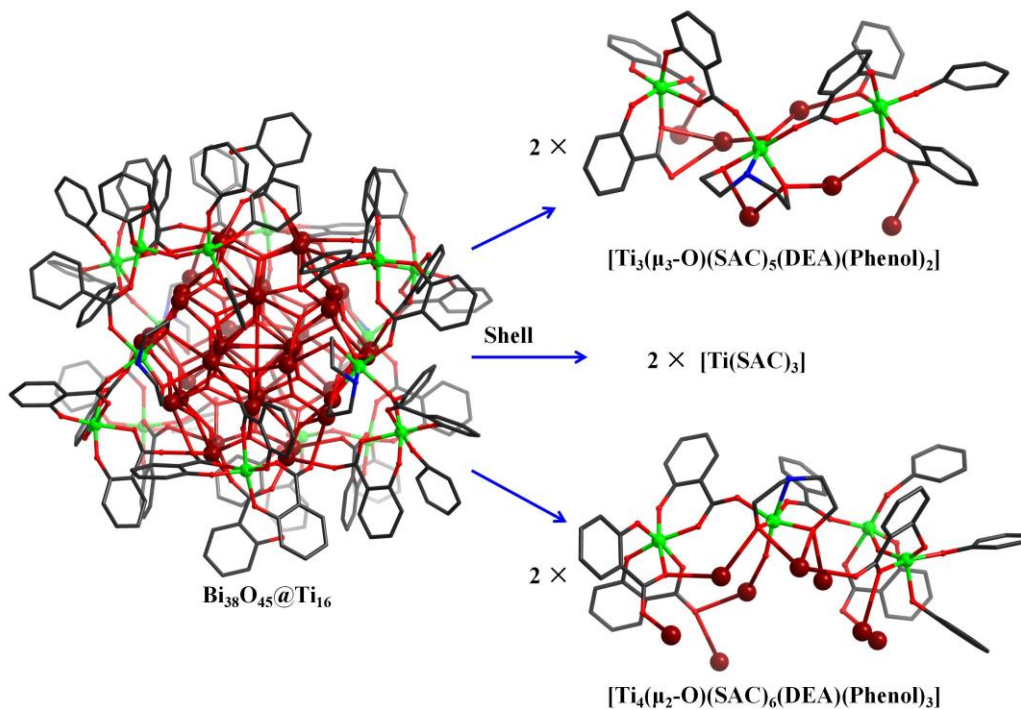

**Figure S7.** (a) The core-shell structure of PTC-283, the shell is made up of two  $[\text{Ti}_3(\mu_3\text{-O})(\text{SAC})_5(\text{DEA})_2(\text{Phenol})_2]$  units, two  $[\text{Ti}_4(\mu_2\text{-O})(\text{SAC})_6((\text{DEA})(\text{Phenol})_3)]$  units and two  $[\text{Ti}(\text{SAC})_3]$  metalloligands. Color codes: green Ti; dark red Bi; black C; red O.



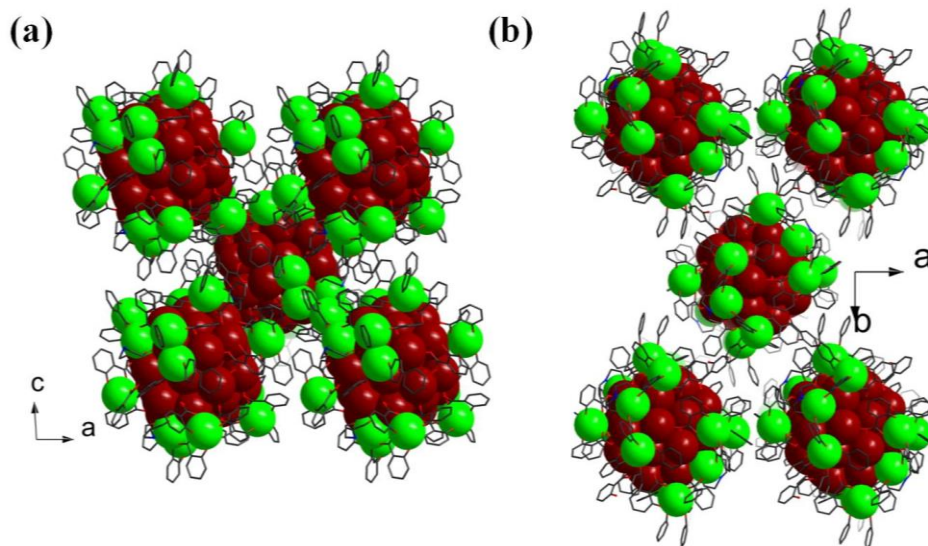

Figure S8. The packing view of PTC-283 along the b and c-axis. Color codes: green Ti; dark red Bi; black C; red O.

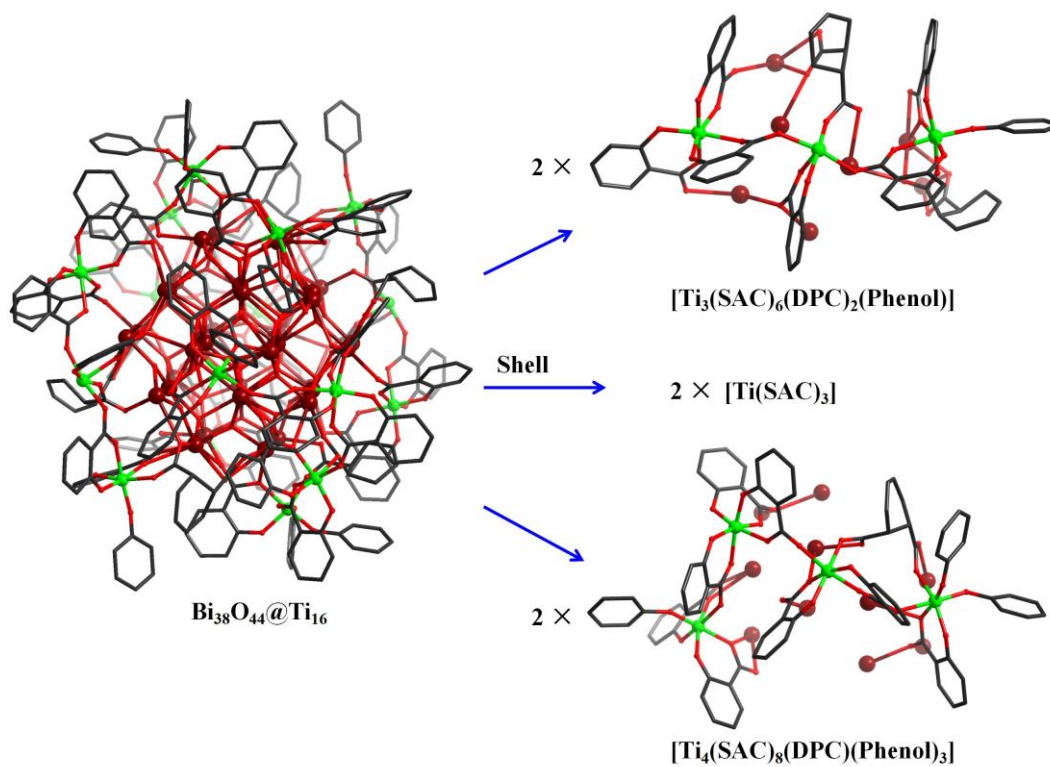

Figure S9. (a) The core-shell structure of PTC-284, the shell is made up of two  $[\text{Ti}_3((\text{SAC})_6(\text{DPC})_2(\text{Phenol}))]$  units, two  $[\text{Ti}_4(\text{SAC})_8((\text{DPC})(\text{Phenol})_3)]$  units and two  $[\text{Ti}(\text{SAC})_3]$  metalloligands. Color codes: green Ti; dark red Bi; black C; red O.

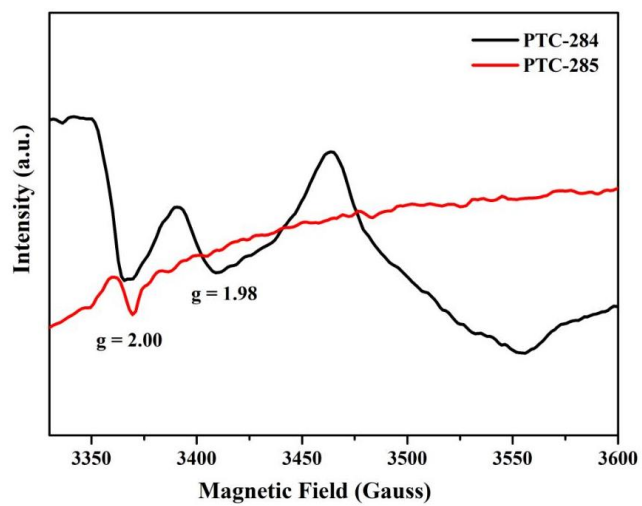

Figure S10. ESR spectra of PTC-284 and PTC-285.

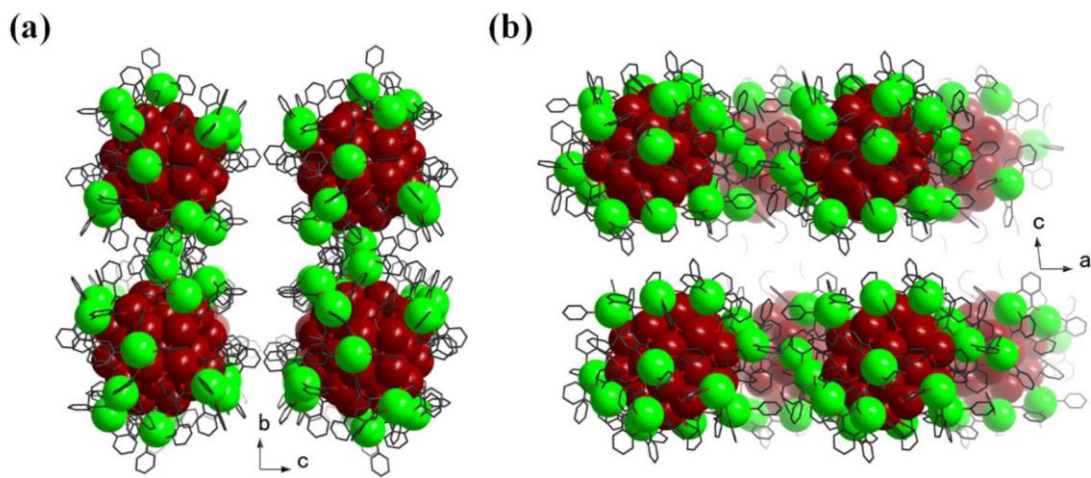

Figure S11. The packing view of PTC-284 along the a and b-axis. Color codes: green Ti; dark red Bi; black C; red O.

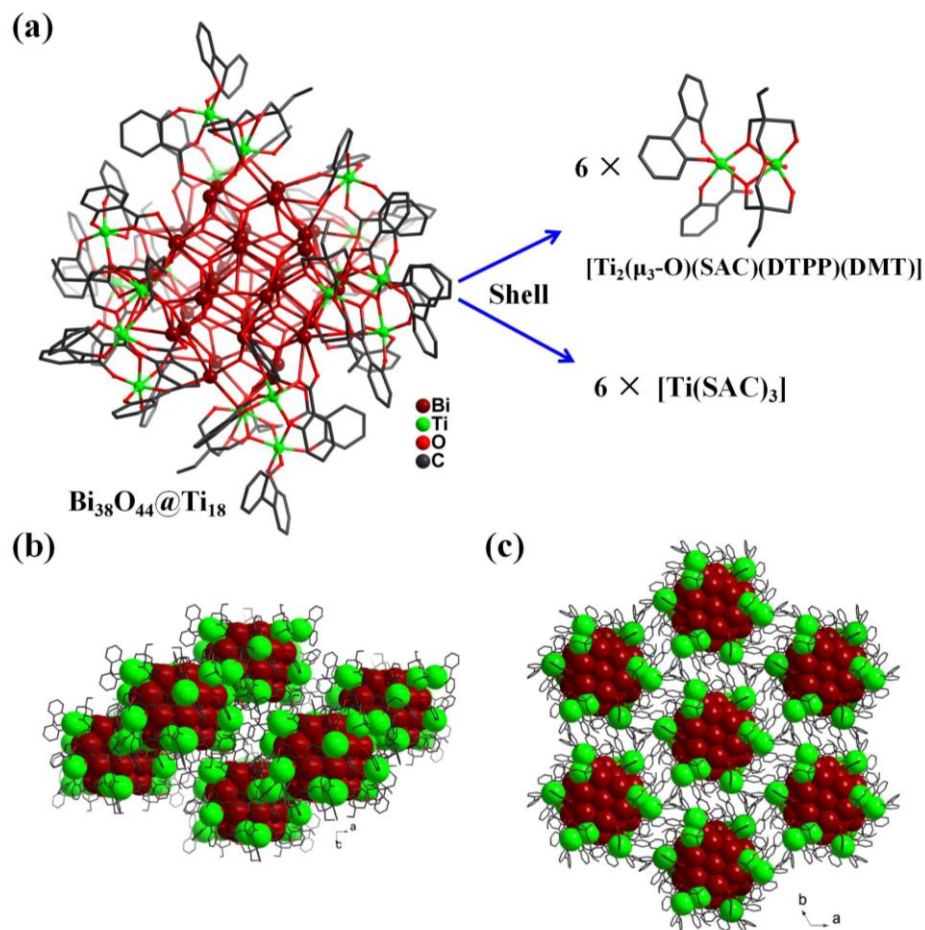

Figure S12. (a) The core-shell structure of PTC-285, the shell is made up of six  $[\text{Ti}_2(\mu_3\text{-O})(\text{SAC})(\text{DTPP})(\text{DMT})]$  units and six  $[\text{Ti}(\text{SAC})_3]$  metalloligands; (b) and (c) the packing view of PTC-285 along the b and c-axis.

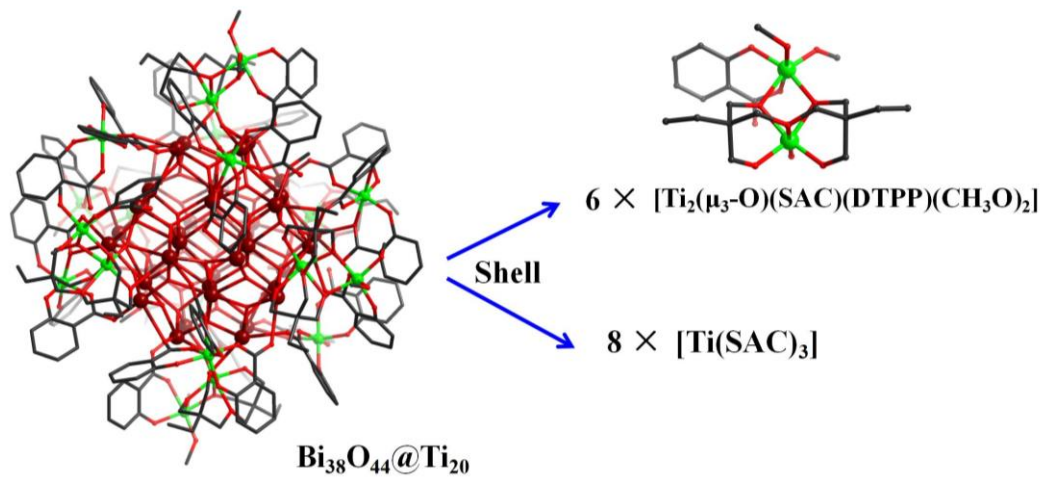

Figure S13. The core-shell structure of PTC-286, the shell is made up of six  $[\text{Ti}_2(\mu_3\text{-O})(\text{SAC})(\text{DTPP})(\text{CH}_3\text{O})_2]$  units and eight  $[\text{Ti}(\text{SAC})_3]$  metalloligands.



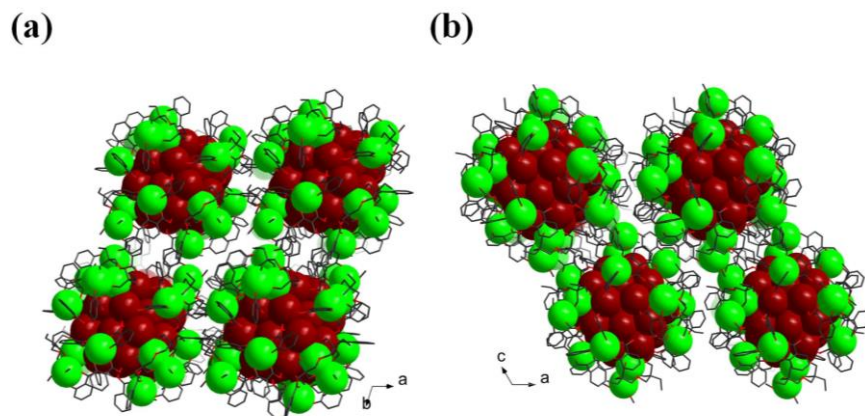

Figure S14. The packing view of PTC-286 along the c- and b- axis. Color codes: green Ti; dark red Bi; black C; red O.

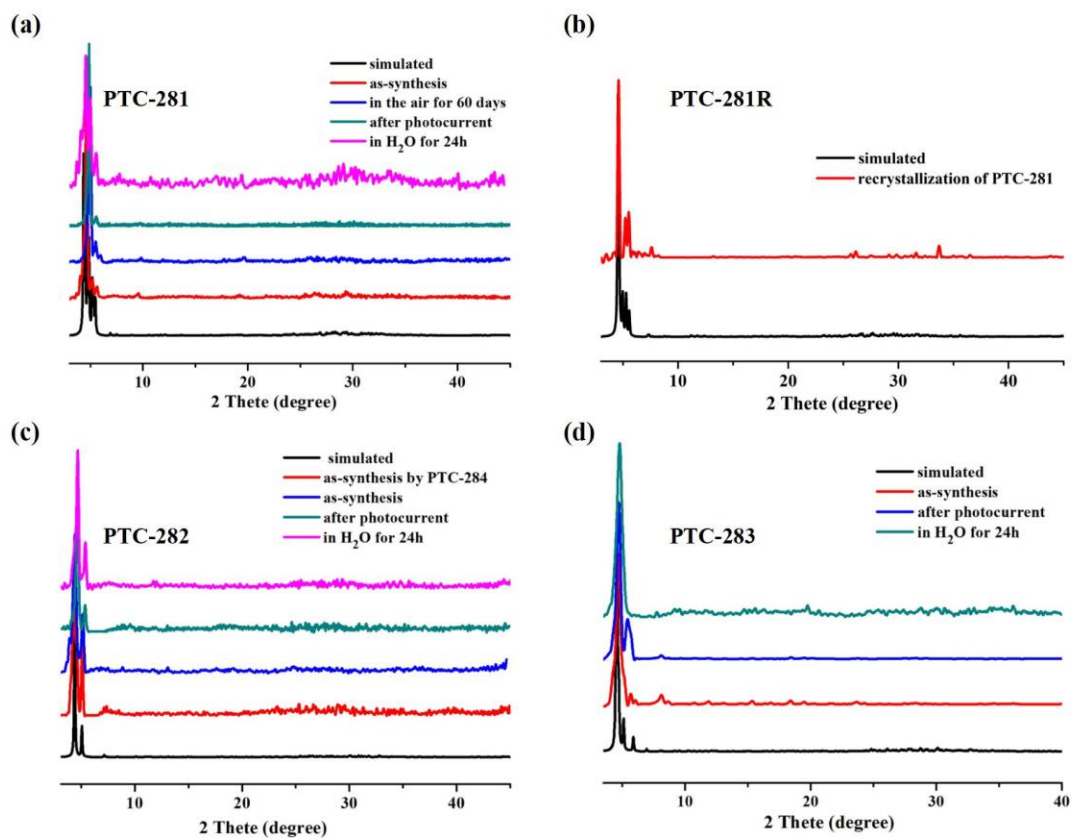

Figure S15. The simulated and experimental PXRD patterns for PTC-281 to PTC-283.

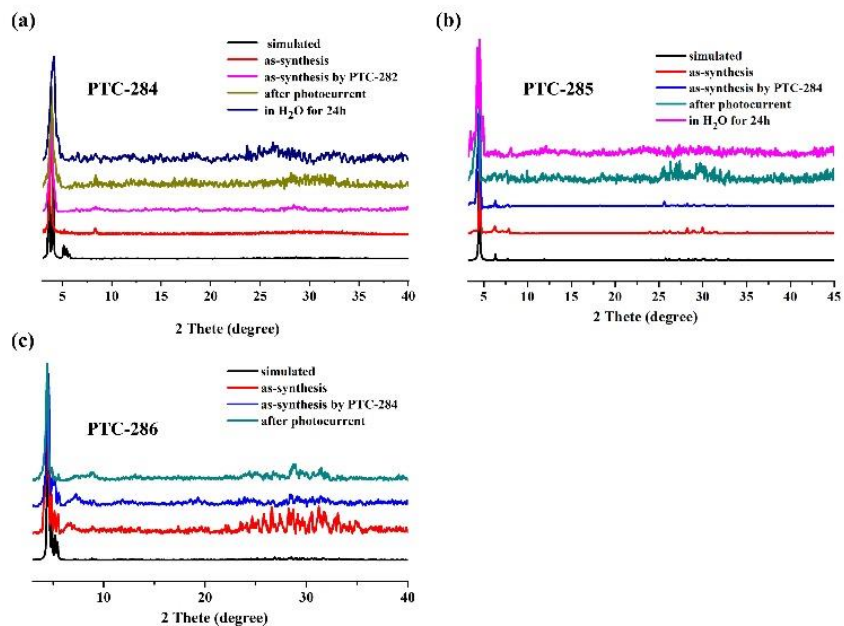

Figure S16. The simulated and recrystallization PXRD patterns for PTC-284 to PTC-286.

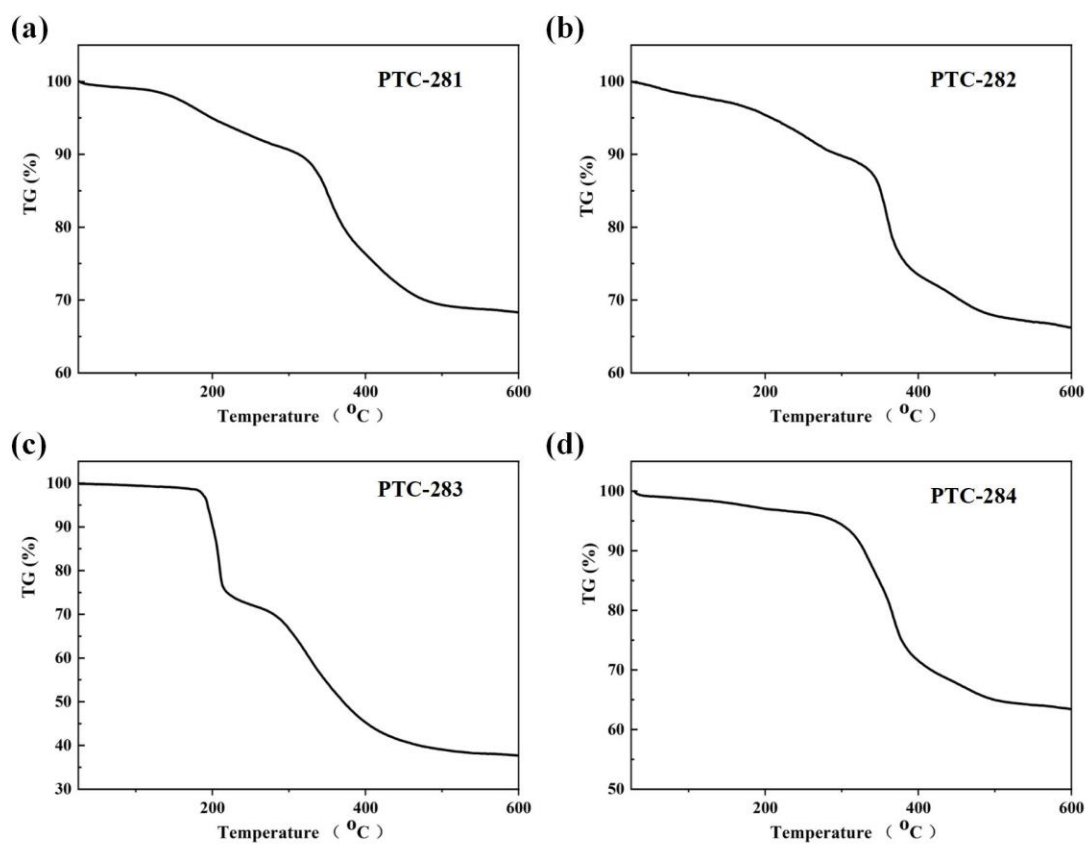

Figure S17. TGA curves of PTC-281 to PTC-284.

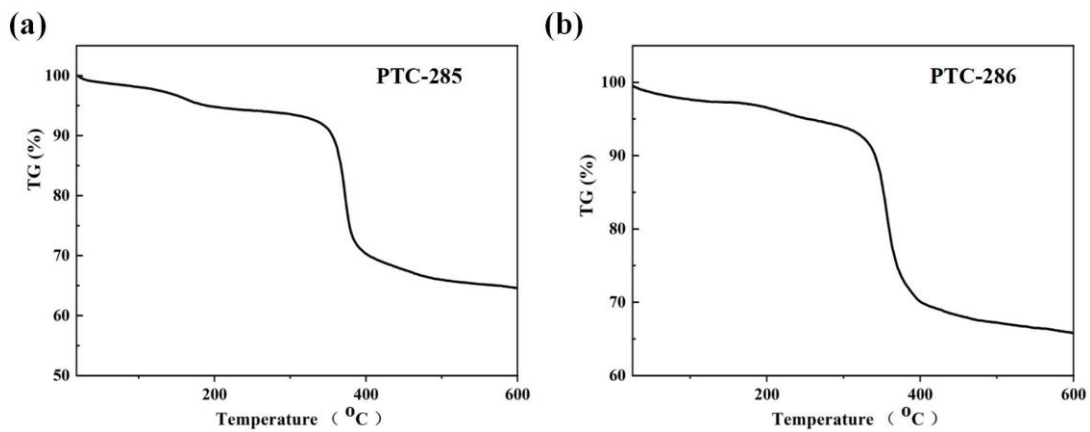

Figure S18. TGA curves of PTC-285 and PTC-286.

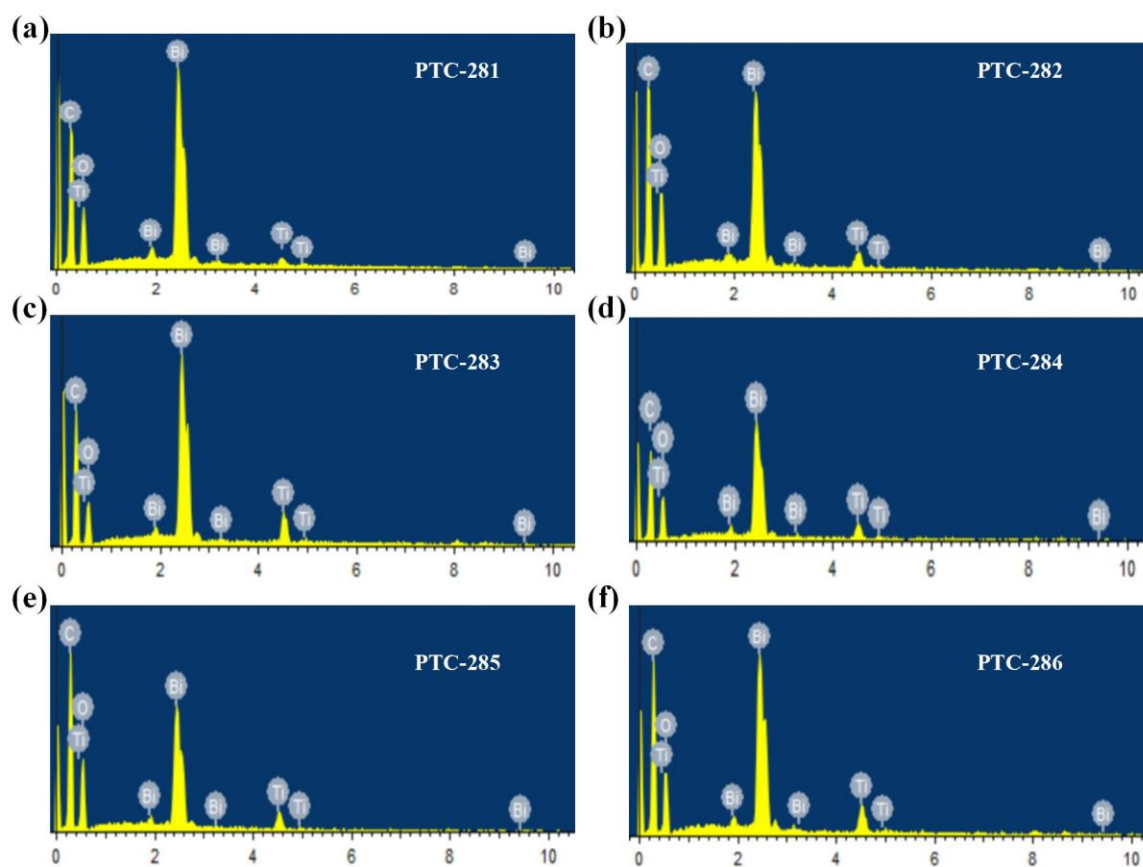

Figure S19. The EDS results of PTC-284 to PTC-286.

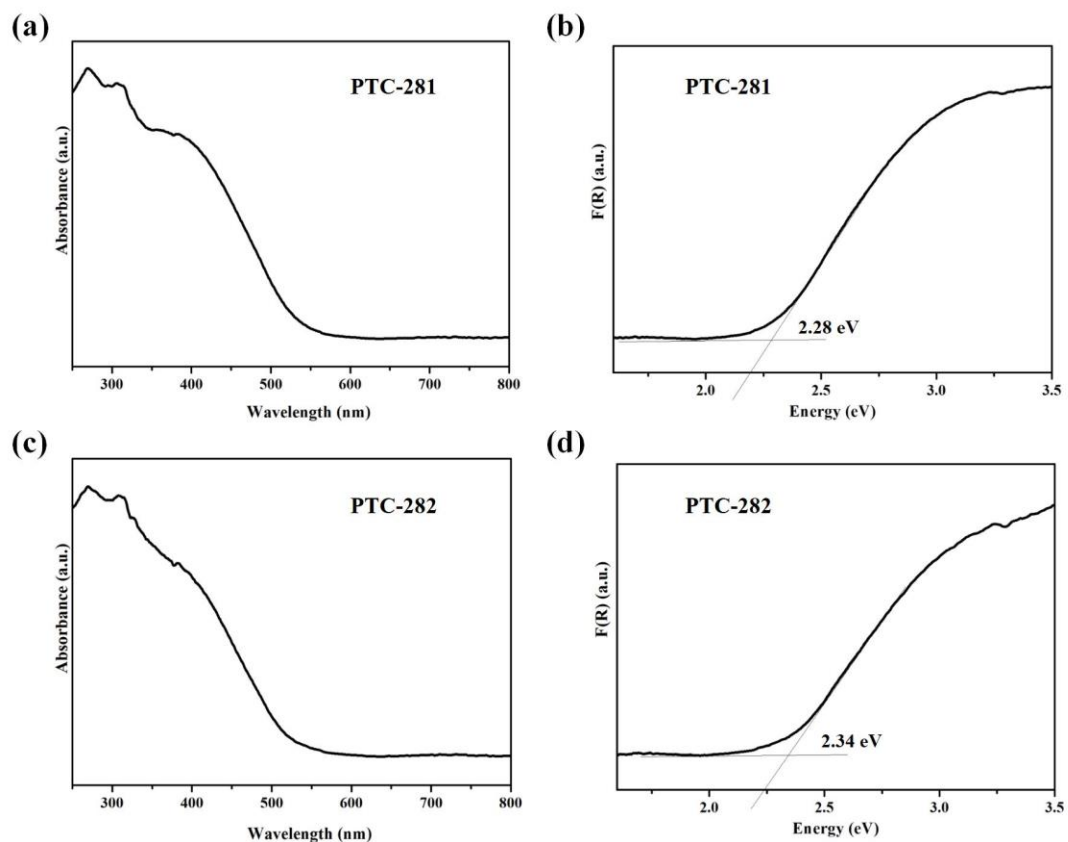

Figure S20. The absorption and bandgap spectra of PTC-281 and PTC-282.

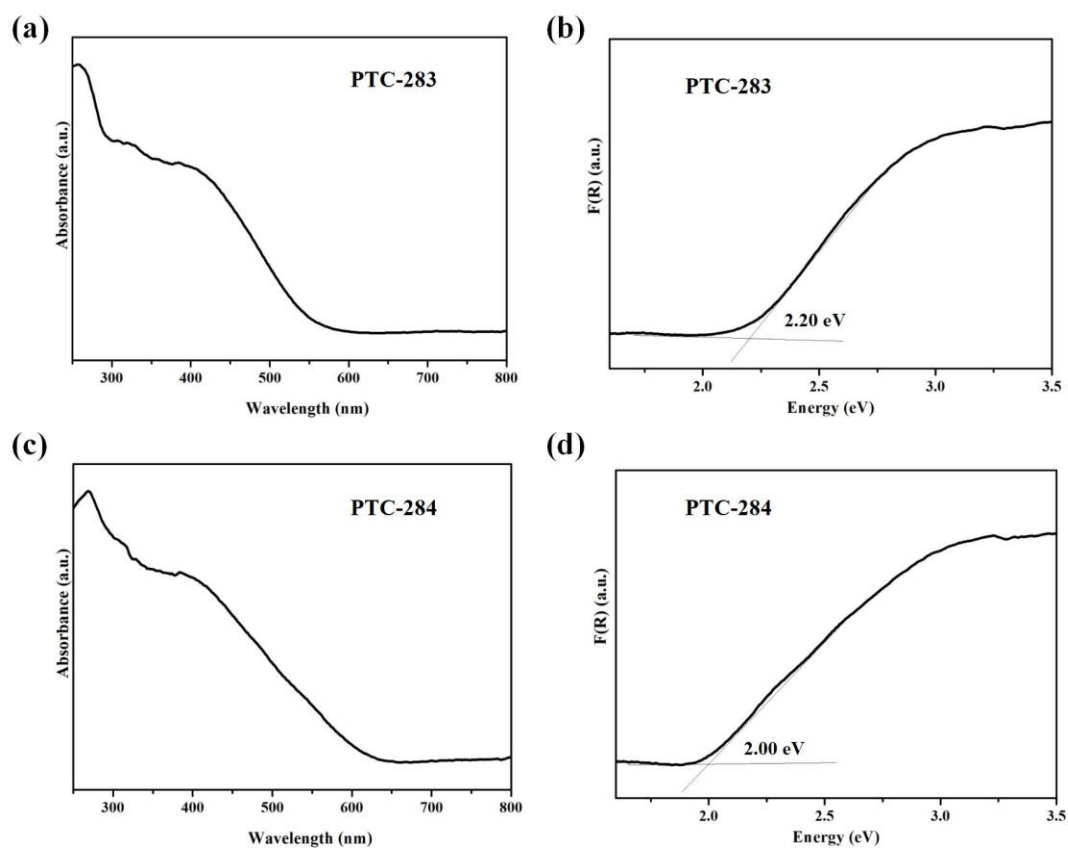

Figure S21. The absorption and bandgap spectra of PTC-283 and PTC-284.

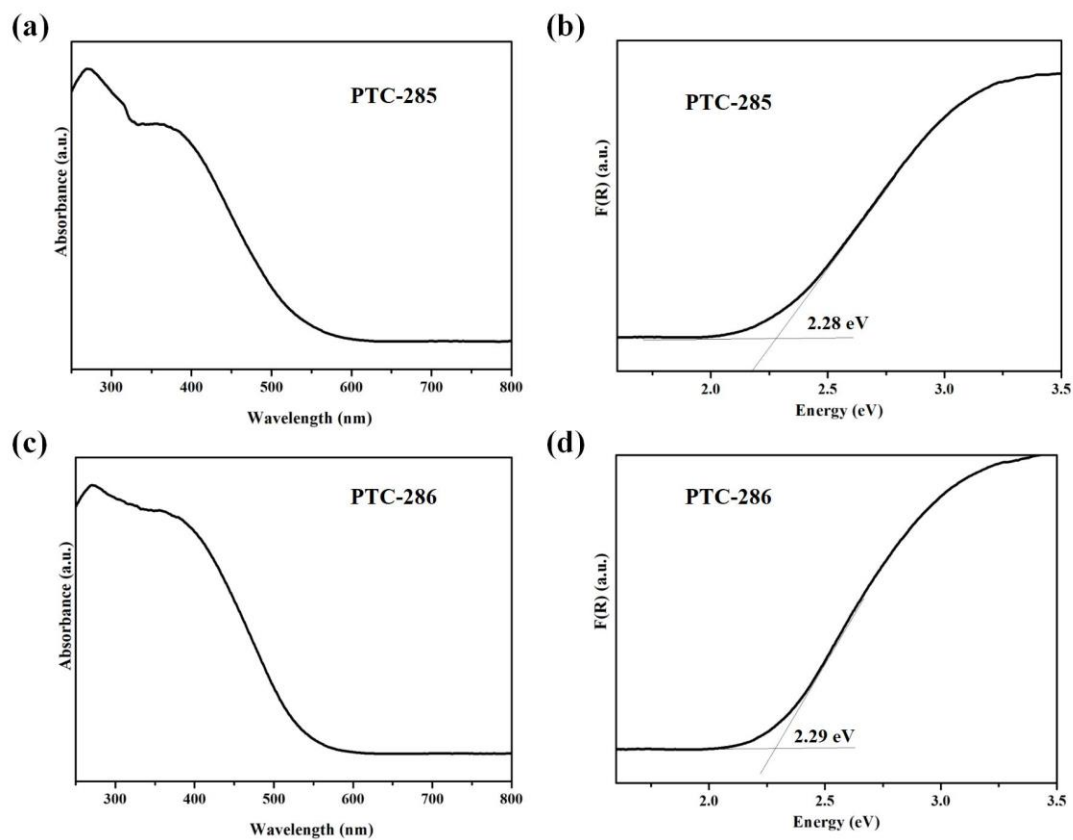

Figure S22. The absorption and bandgap spectra of PTC-285 and PTC-286.

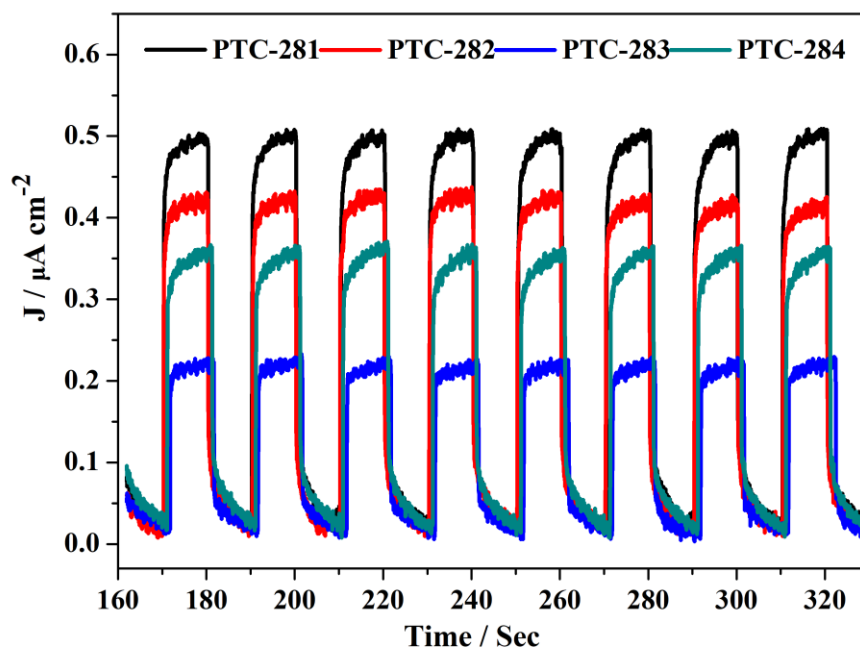

Figure S23. Transient photocurrent responses of PTC-281 to PTC-284 irradiated by visible light in 0.2 M  $\text{Na}_2\text{SO}_4$  electrolyte solution.

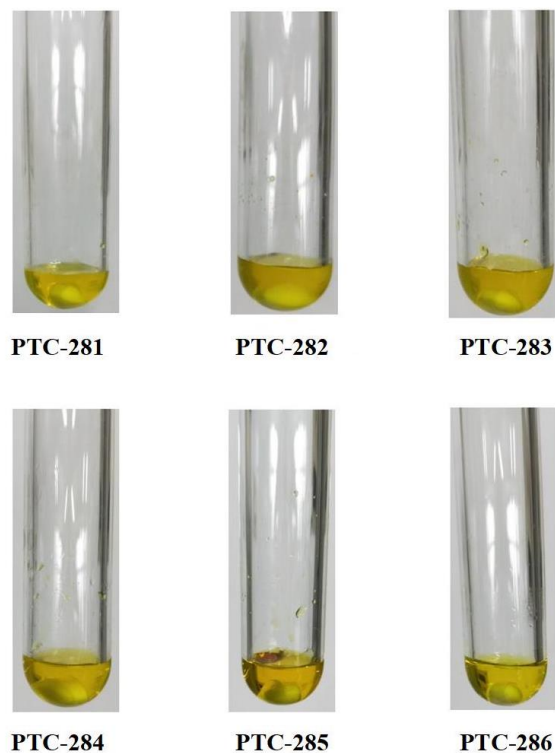

Figure S24. Photos of all samples after the catalytic reaction. Reaction conditions: 10 mmol epichlorohydrin, 0.005 mmol catalysts, 1 mmol  $n\text{Bu}_4\text{NBr}$ ,  $\text{CO}_2$  (1 atm gauge pressure) and room temperature, for 24 h.

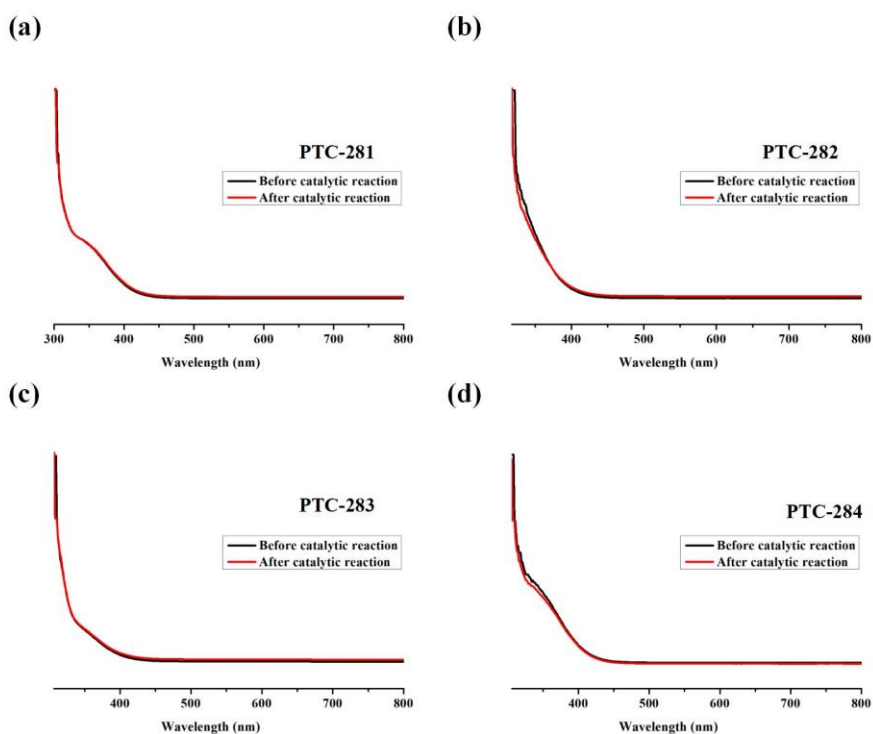

Figure S25. The solution-state UV-vis spectra of PTC-281 to PTC-284 before and after catalytic reaction. Reaction conditions: 10 mmol epichlorohydrin, 0.005 mmol catalysts, 1 mmol  $n\text{Bu}_4\text{NBr}$ ,  $\text{CO}_2$  (1 atm gauge pressure) and room temperature, for 24 h.

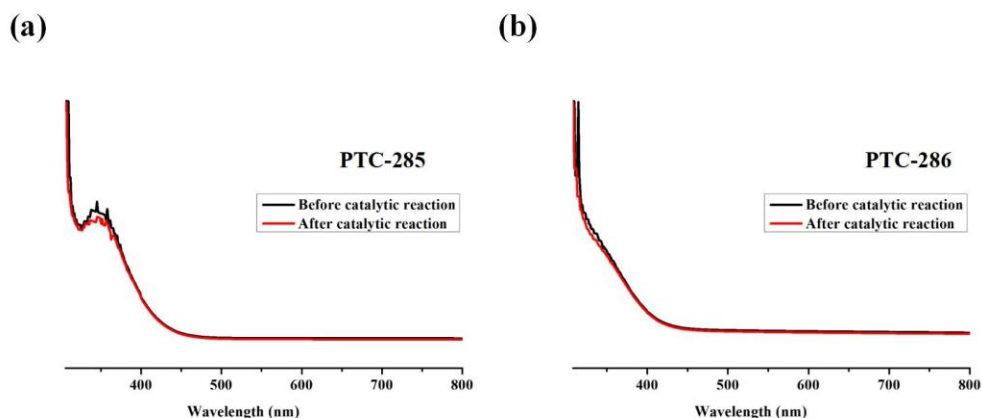

Figure S26. The solution-state UV-vis spectra of PTC-285 and PTC-286 before and after catalytic reaction. Reaction conditions: 10 mmol epichlorohydrin, 0.005 mmol catalysts, 1 mmol  $n\text{Bu}_4\text{NBr}$ ,  $\text{CO}_2$  (1 atm gauge pressure) and room temperature, for 24 h.

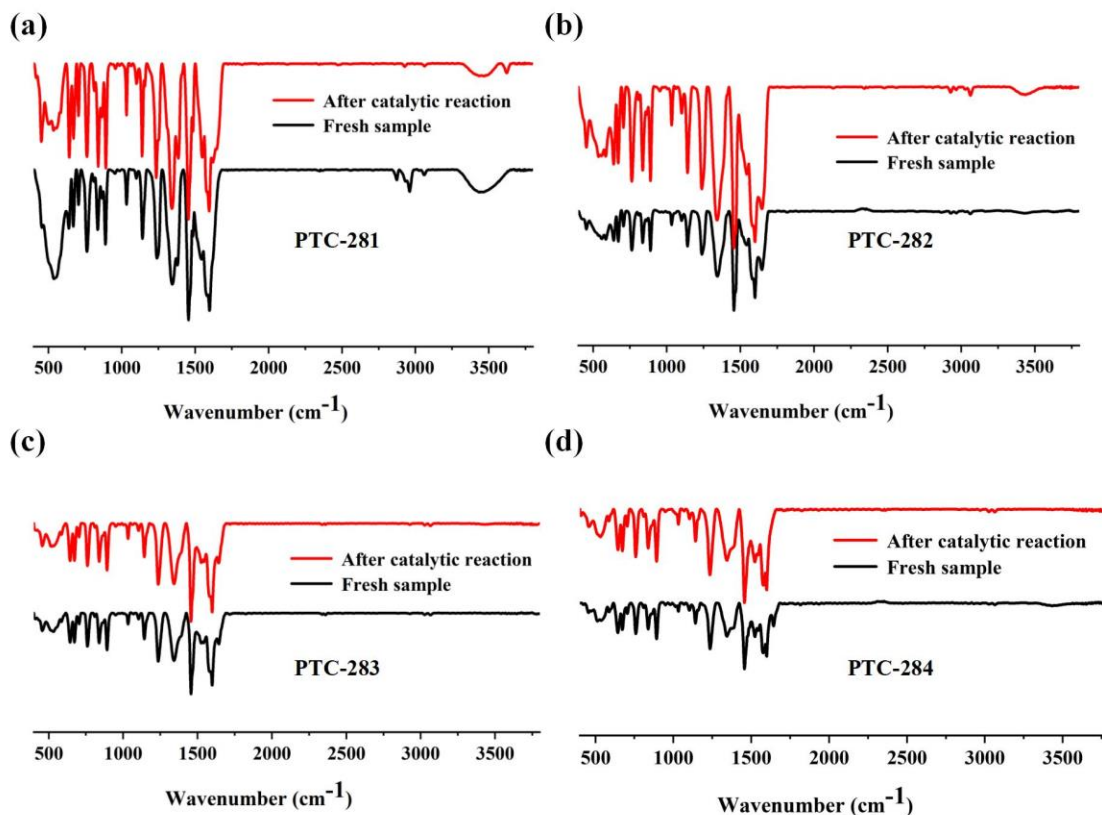

Figure S27. The solid-state IR spectra of PTC-281 to PTC-284 before and after catalytic reaction. Reaction conditions: 10 mmol epichlorohydrin, 0.005 mmol catalysts, 1 mmol  $n\text{Bu}_4\text{NBr}$ ,  $\text{CO}_2$  (1 atm gauge pressure) and room temperature, for 24 h.



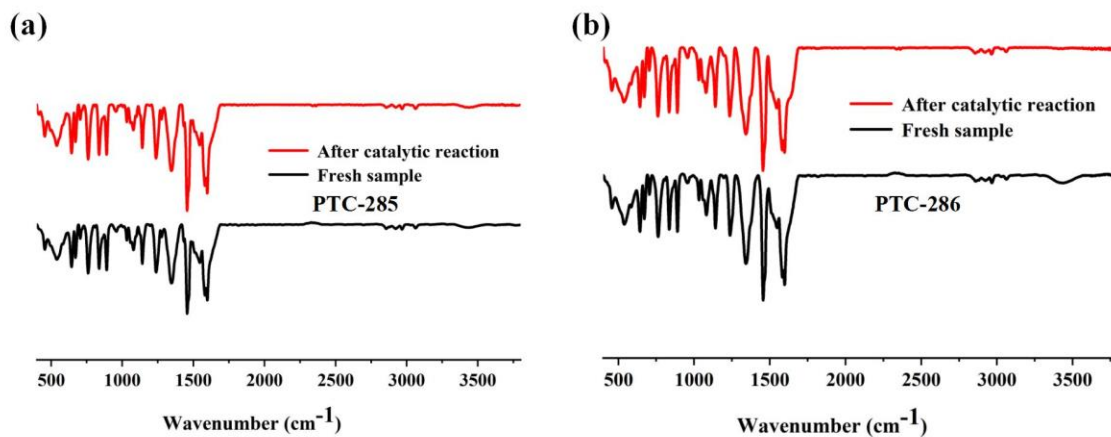

**Figure S28.** The solid-state IR spectra of PTC-285 and PTC-286 before and after catalytic reaction. Reaction conditions: 10 mmol epichlorohydrin, 0.005 mmol catalysts, 1 mmol  $n\text{Bu}_4\text{NBr}$ ,  $\text{CO}_2$  (1 atm gauge pressure) and room temperature, for 24 h.

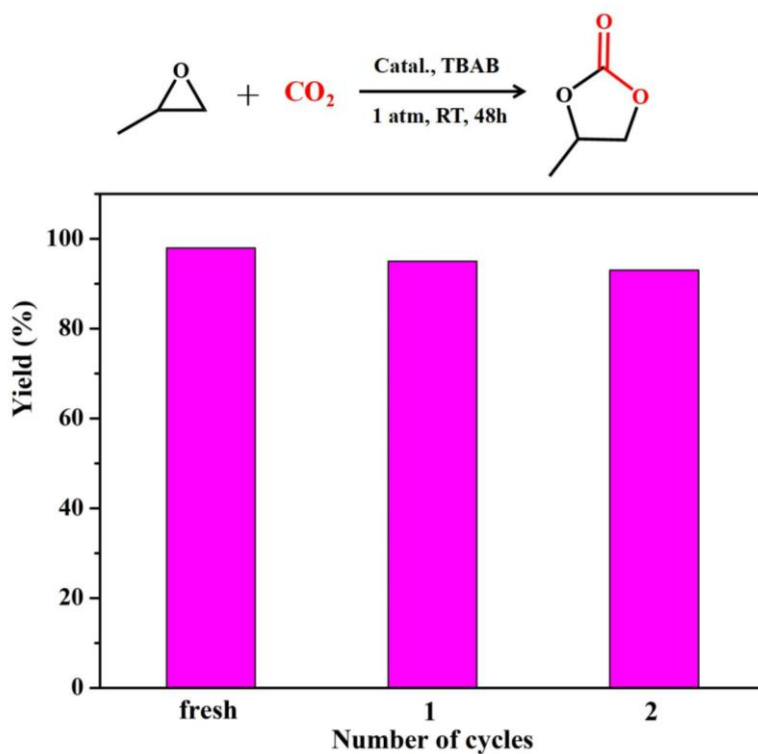

**Figure S29.** Recyclability of the PTC-285 catalyst. Reaction conditions: 10 mmol propylene oxide, 0.005 mmol catalysts, 1 mmol  $n\text{Bu}_4\text{NBr}$ ,  $\text{CO}_2$  (1 atm gauge pressure) and room temperature, for 48 h.



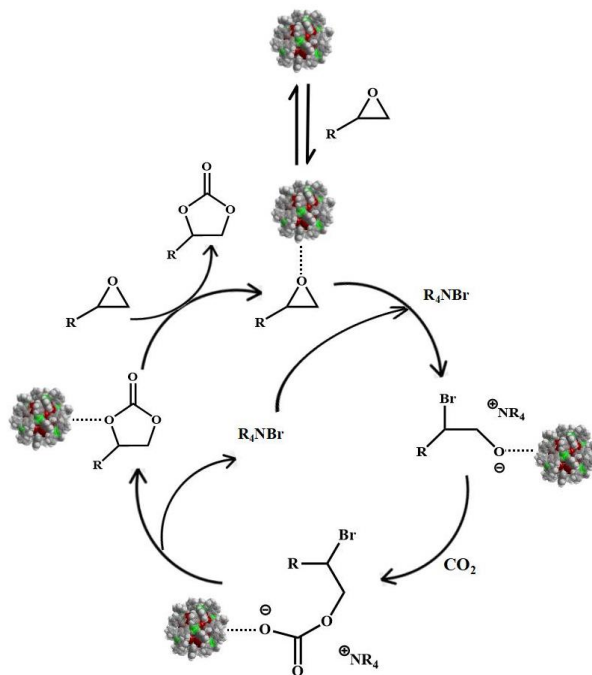

**Figure S30.** Proposed mechanism for cycloaddition of epoxides with  $\text{CO}_2$  catalyzed by  $\text{Bi}_{38}\text{O}_{44/45}@\text{Ti}_x\text{L-oxo}$  core-shell clusters.

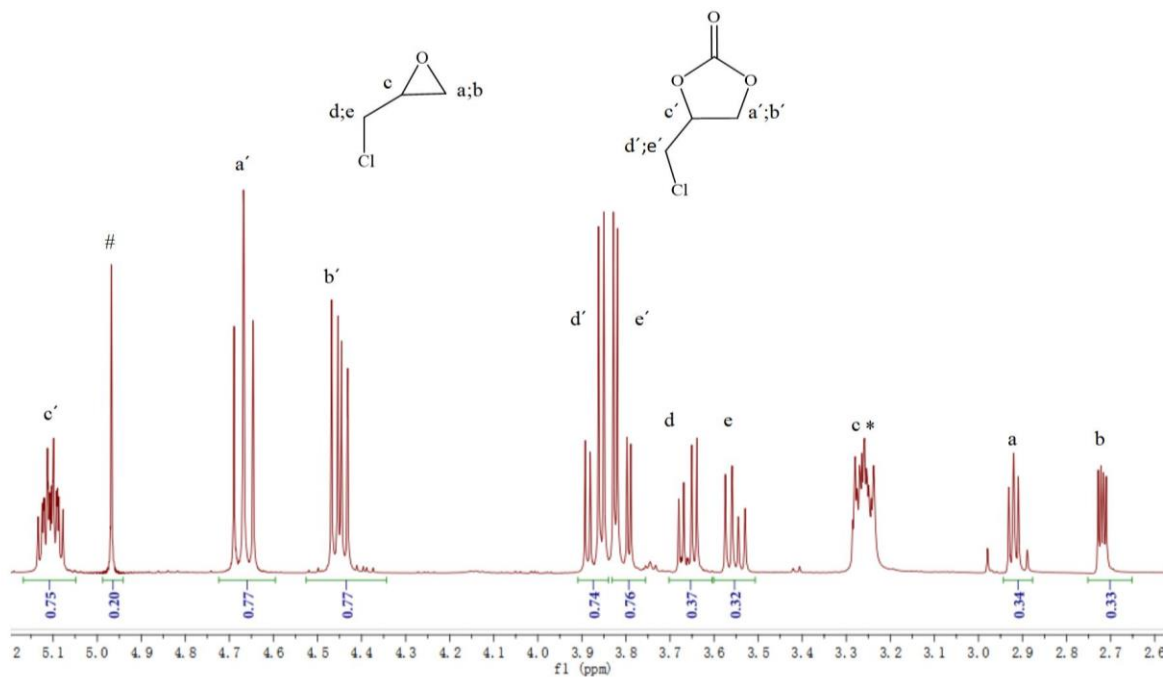

**Figure S31.**  $^1\text{H}$  NMR spectra after 24 h  $\text{CO}_2$  cycloaddition reaction of epichlorohydrin with PTC-281 as catalyst. Peaks marked with \* are for TBAB, with # is for  $\text{CH}_2\text{Br}_2$ .

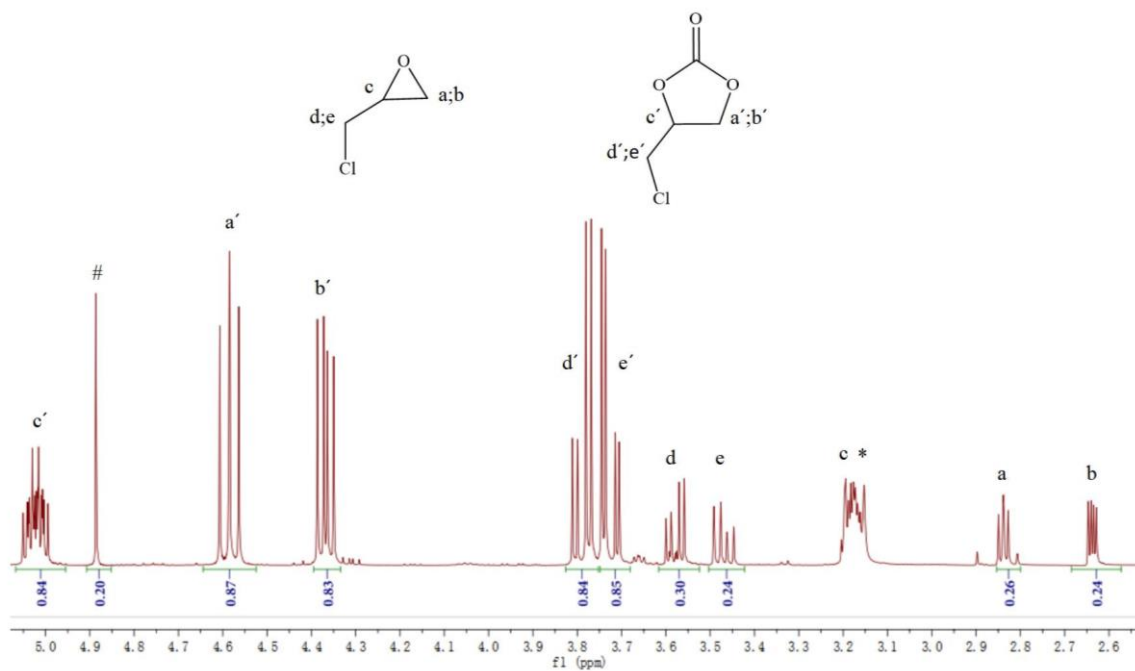

Figure S32.  $^1\text{H}$  NMR spectra after 24 h  $\text{CO}_2$  cycloaddition reaction of epichlorohydrin with PTC-282 as catalyst. Peaks marked with \* are for TBAB, with # is for  $\text{CH}_2\text{Br}_2$ .

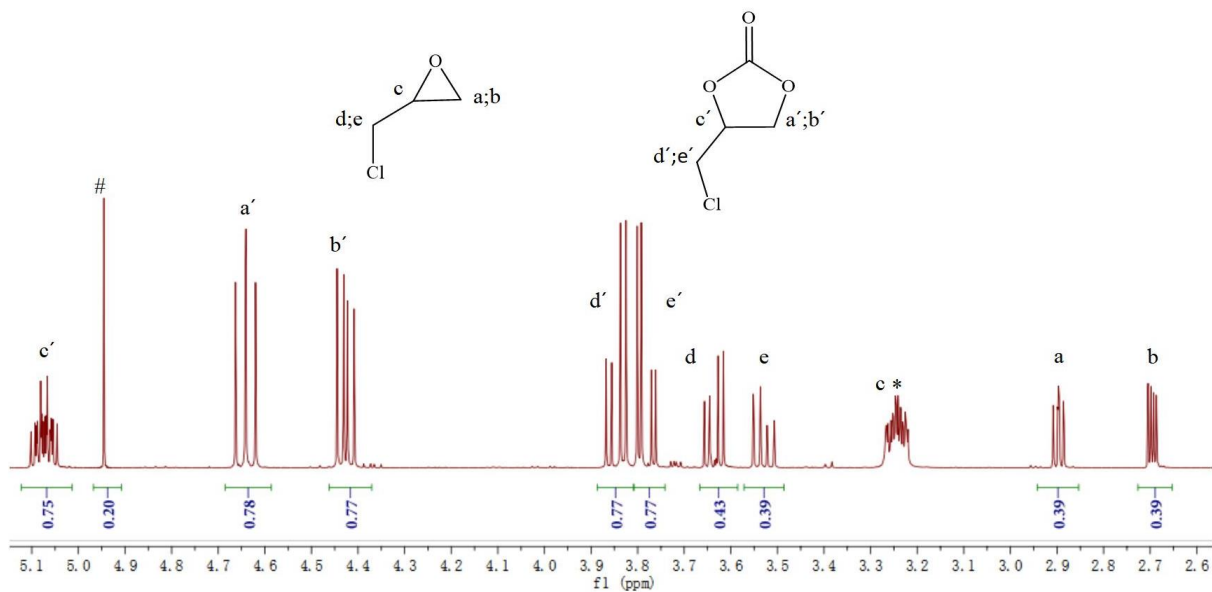

Figure S33.  $^1\text{H}$  NMR spectra after 24 h  $\text{CO}_2$  cycloaddition reaction of epichlorohydrin with PTC-283 as catalyst. Peaks marked with \* are for TBAB, with # is for  $\text{CH}_2\text{Br}_2$ .

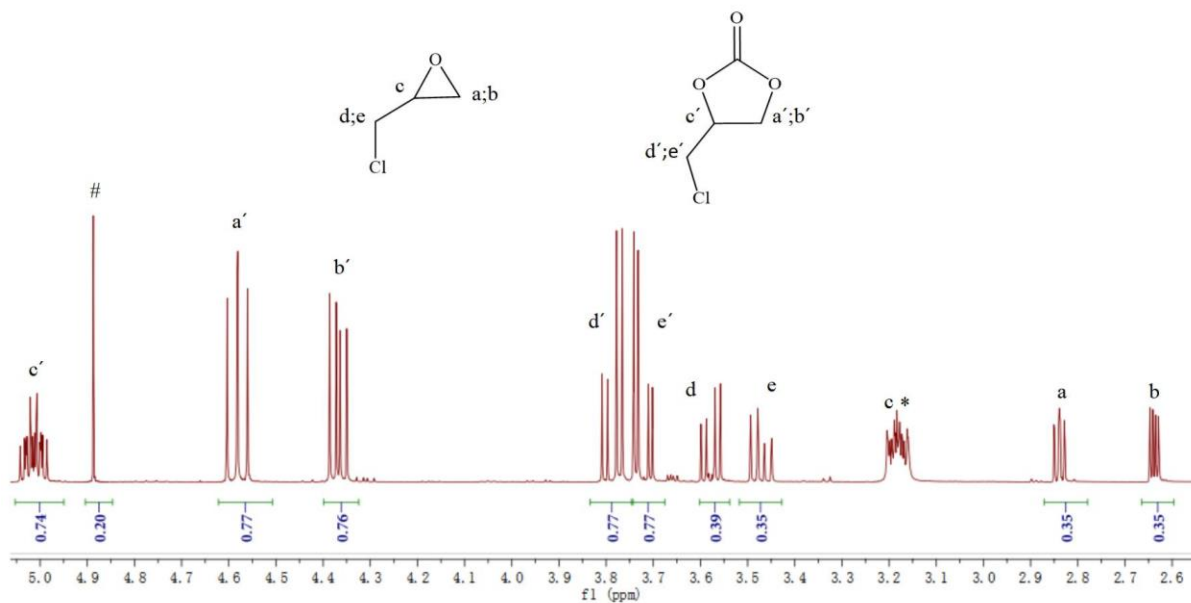

Figure S34.  $^1\text{H}$  NMR spectra after 24 h  $\text{CO}_2$  cycloaddition reaction of epichlorohydrin with PTC-284 as catalyst. Peaks marked with \* are for TBAB, with # is for  $\text{CH}_2\text{Br}_2$ .

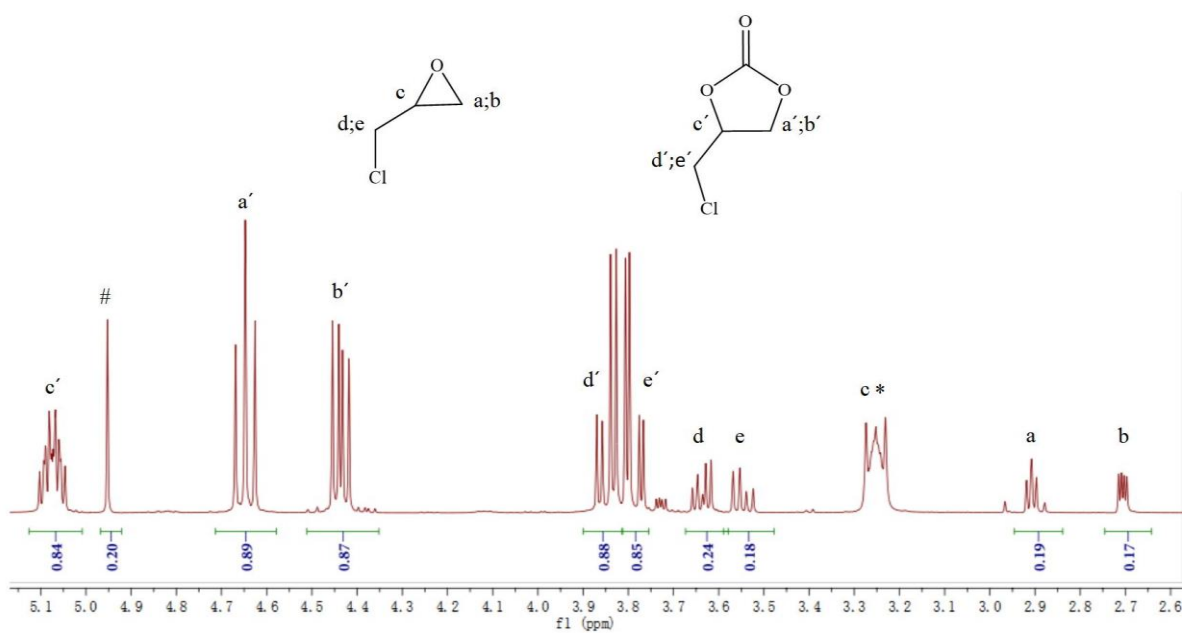

Figure S35.  $^1\text{H}$  NMR spectra after 24 h  $\text{CO}_2$  cycloaddition reaction of epichlorohydrin with PTC-285 as catalyst. Peaks marked with \* are for TBAB, with # is for  $\text{CH}_2\text{Br}_2$ .

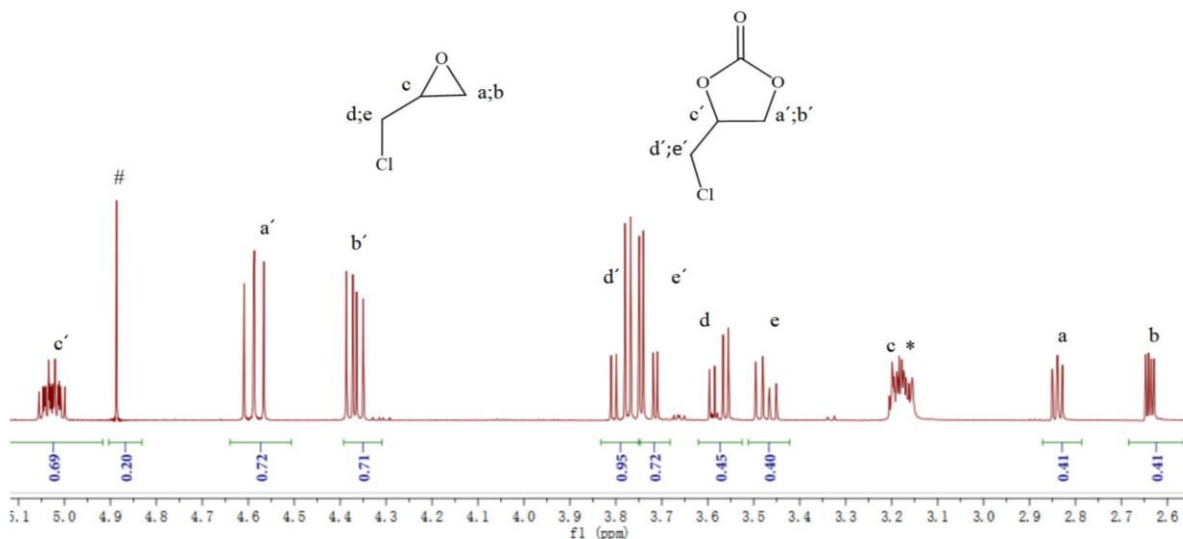

Figure S36.  $^1\text{H}$  NMR spectra after 24 h  $\text{CO}_2$  cycloaddition reaction of epichlorohydrin with PTC-286 as catalyst. Peaks marked with \* are for TBAB, with # is for  $\text{CH}_2\text{Br}_2$ .

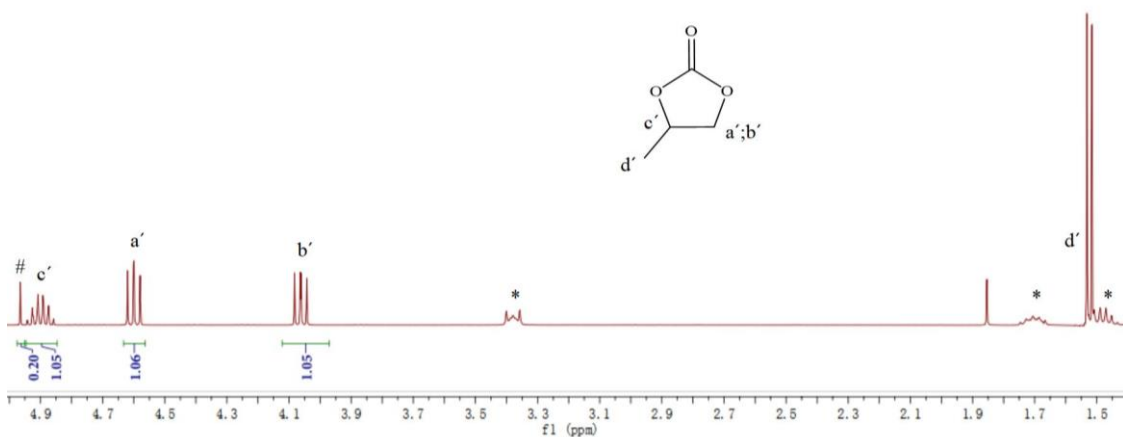

Figure S37.  $^1\text{H}$  NMR spectra after 48 h  $\text{CO}_2$  cycloaddition reaction of propylene oxide with PTC-285 as catalyst. Peaks marked with \* are for TBAB, with # is for  $\text{CH}_2\text{Br}_2$ .

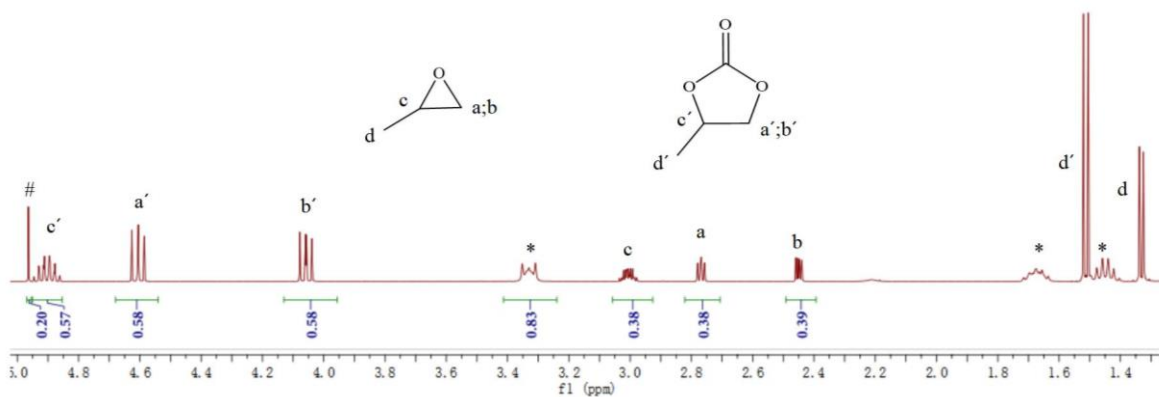

Figure S38.  $^1\text{H}$  NMR spectra after 48 h  $\text{CO}_2$  cycloaddition reaction of propylene oxide with PTC-286 as catalyst. Peaks marked with \* are for TBAB, with # is for  $\text{CH}_2\text{Br}_2$ .

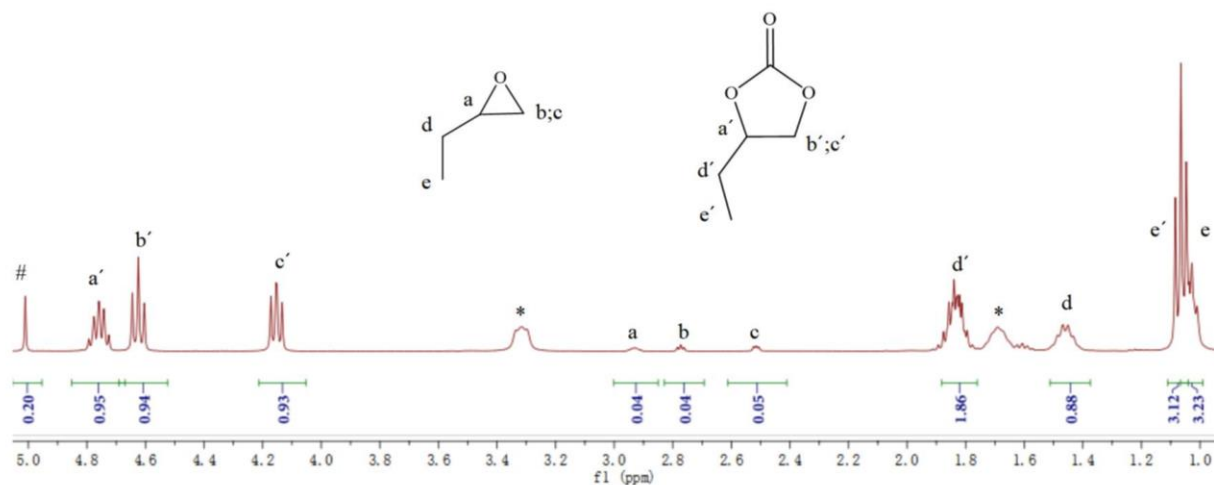

Figure S39. <sup>1</sup>H NMR spectra after 48 h CO<sub>2</sub> cycloaddition reaction of 1,2-epoxybutane with PTC-285 as catalyst. Peaks marked with \* are for TBAB, with # is for CH<sub>2</sub>Br<sub>2</sub>.

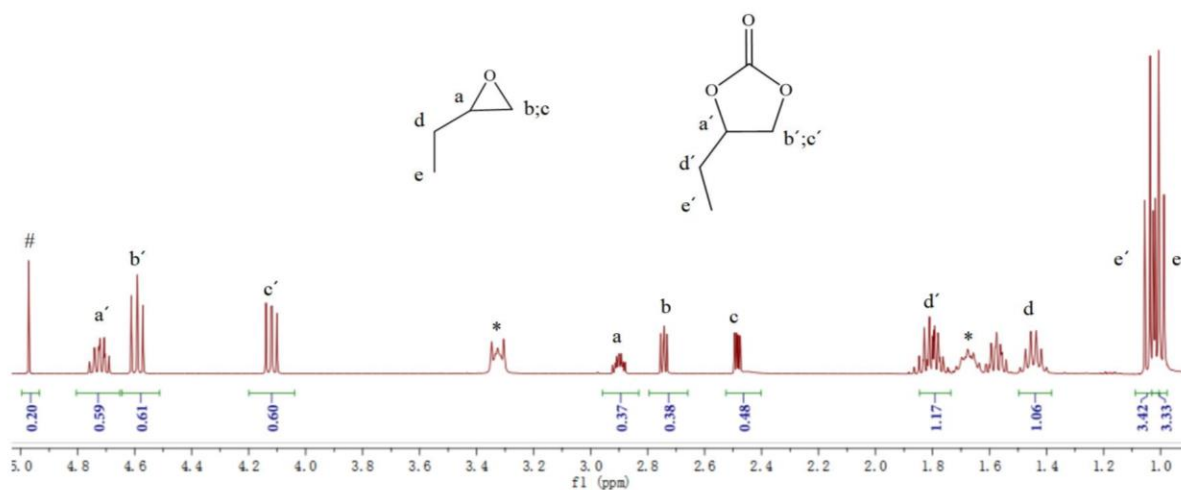

Figure S40. <sup>1</sup>H NMR spectra after 48 h CO<sub>2</sub> cycloaddition reaction of 1,2-epoxybutane with PTC-286 as catalyst. Peaks marked with \* are for TBAB, with # is for CH<sub>2</sub>Br<sub>2</sub>.

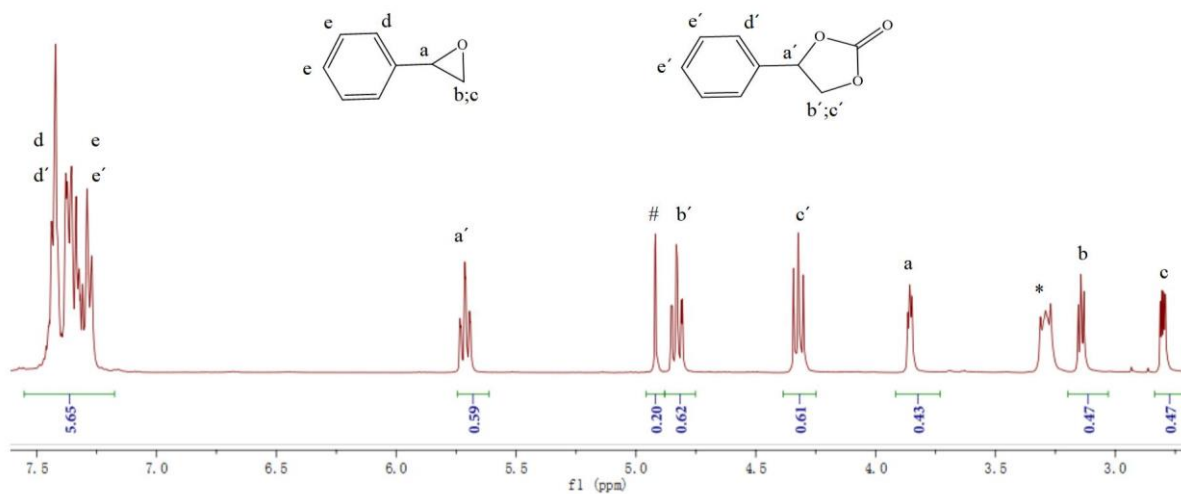

Figure S41. <sup>1</sup>H NMR spectra after 48 h CO<sub>2</sub> cycloaddition reaction of styrene oxide with PTC-285 as catalyst. Peak marked with \* is for TBAB, with # is for CH<sub>2</sub>Br<sub>2</sub>.

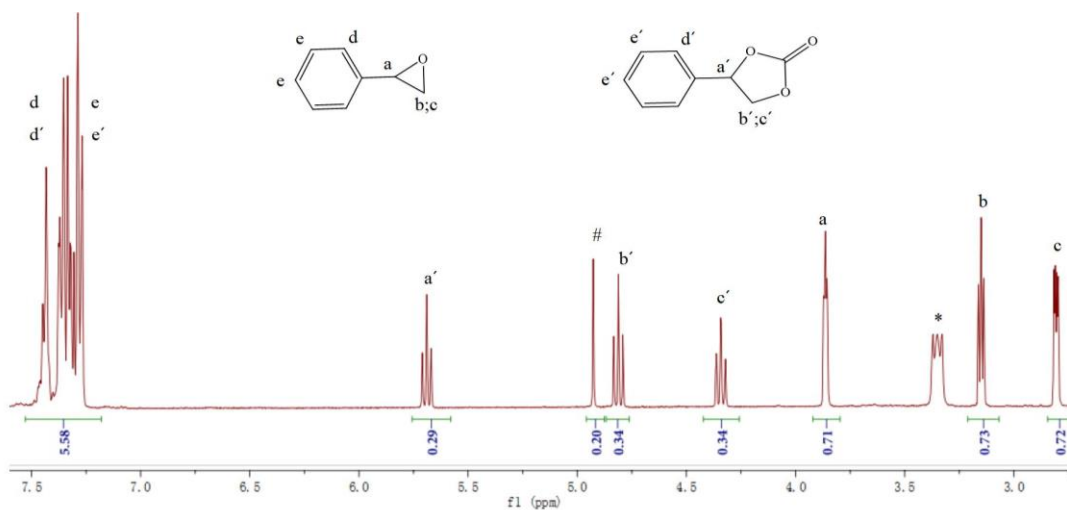

Figure S42. <sup>1</sup>H NMR spectra after 48 h CO<sub>2</sub> cycloaddition reaction of styrene oxide with PTC-286 as catalyst. Peak marked with \* is for TBAB, with # is for CH<sub>2</sub>Br<sub>2</sub>.

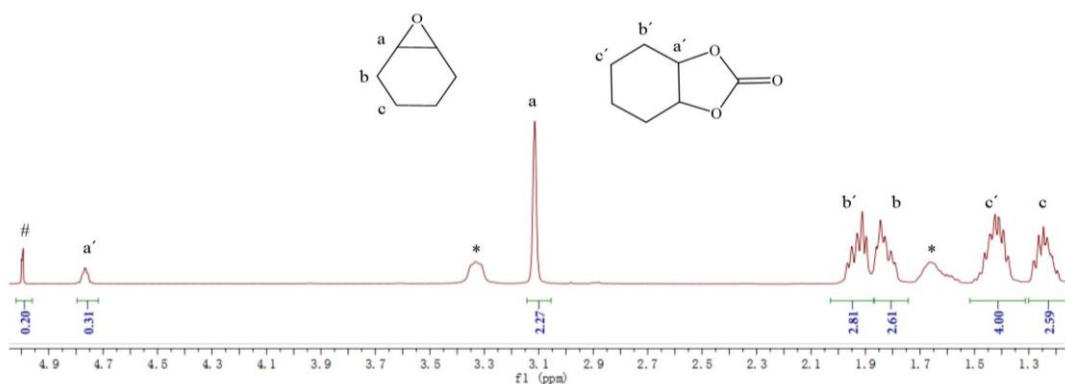

Figure S43. <sup>1</sup>H NMR spectra after 48 h CO<sub>2</sub> cycloaddition reaction of cyclohexene oxide with PTC-285 as catalyst. Peaks marked with \* are for TBAB, with # is for CH<sub>2</sub>Br<sub>2</sub>.

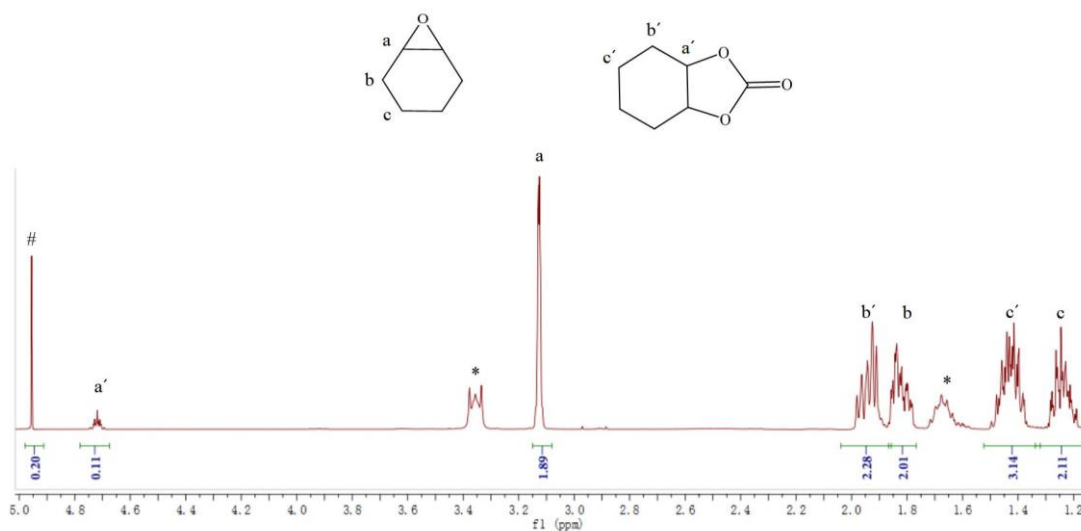

Figure S44. <sup>1</sup>H NMR spectra after 48 h CO<sub>2</sub> cycloaddition reaction of cyclohexene oxide with PTC-286 as catalyst. Peaks marked with \* are for TBAB, with # is for CH<sub>2</sub>Br<sub>2</sub>.

**Table S6.** The summary of the conversion of CO<sub>2</sub> and epoxides by some typical cluster catalysts and Bi - based materials

| No. | Compounds                                                                                                        | Co-catalysts                      | T (°C) | P (MPa) | t (h) | Yield (%) | Ref.      |
|-----|------------------------------------------------------------------------------------------------------------------|-----------------------------------|--------|---------|-------|-----------|-----------|
| 1   | PTC-285                                                                                                          | TBAB 10 mol%                      | r. t.  | 0.1     | 48    | 99        | This work |
| 2   | Au <sub>19</sub> Ag <sub>4</sub> (S-Adm) <sub>15</sub>                                                           | TBAB 10 mol%                      | 60     | 2       | 24    | 85        | [6]       |
| 3   | Tb <sub>2</sub> Zn <sub>2</sub> (μ <sub>3</sub> -OH) <sub>2</sub> L <sub>4</sub> (NO <sub>3</sub> ) <sub>4</sub> | TBAB 7.2 mol%                     | r. t.  | 0.1     | 48    | 99        | [7]       |
| 4   | Zn <sub>4</sub> (OCOCF <sub>3</sub> ) <sub>6</sub> O                                                             | TBAI 3 mol%                       | 25     | 0.1     | 6     | 94        | [8]       |
| 5   | Hexanuclear Ti-oxo cluster                                                                                       | TBAI 16 mol%                      | 80     | 10      | 18    | 79        | [9]       |
| 6   | Bismuth methoxide                                                                                                | LiI 0.48 mol%                     | r. t.  | 1       | 24    | 98        | [10]      |
| 7   | Bi(III) porphyrin                                                                                                | TBAI 2.4 mol%                     | 90     | 2       | 1     | 92.9      | [11]      |
| 8   | Cationic Bi(III) complex                                                                                         | TBAB 0.0125 mol%                  | 120    | 3       | 1     | 97.5      | [12]      |
| 9   | Binuclear Bi(III) complex                                                                                        | TBAI 0.10 mol%                    | 140    | 3       | 1     | 97.5      | [13]      |
| 10  | Bi-PCNN-224                                                                                                      | TBAI 1.66 mol%, light irradiation | r. t.  | 1       | 6     | 99        | [14]      |

## References

- (6) G. Li, X. Sui, X. Cai, W. Hu, X. Liu, M. Chen, Y. Zhu, *Angew. Chem. Int. Ed.* 2021, **60**, 10573 -10576.
- (7) R. Zhang, L. Wang, C. Xu, H. Yang, W. Chen, G. Gao, W. Liu, *Dalton Trans.*, 2018, **47**, 7159-7165.
- (8) Y. Yang, Y. Hayashi, Y. Fujii, T. Nagano, Y. Kita, T. Ohshima, K. Mashima, *Catal. Sci. Technol.* 2012, **2**, 509.
- (9) S. Kim, D. Sarkar, Y. Kima, M. H. Park, M. Yoon, Y. Kim, M. Kim, *J. Ind. Eng. Chem.* 2017, **53**, 171-176.
- (10) S.-F. Yin, S. Shimada, *Chem. Commun.* 2009, **9**, 1136-1138.
- (11) J. Peng, Y. Geng, H.-J. Yang, W. He, Z. Wei, J. Yang, C.-Y Guo, *Molecular Catalysis.*, 2017, **432**, 37-46.
- (12) X. Zhang, W. Dai, S. Yin, S. Luo, C. T. Au, *Front. Environ. Sci. Eng. China*, 2009, **3**, 32-37.
- (13) R. H. Qiu, Z. G. Meng, S. F. Yin, X. X. Song, N. Y. Tan, Y. B. Zhou, K. Yu, X. H. Xu, S. L. Luo, C. T. Au, W. Y. Wong, *ChemPlusChem*, 2012, **77**, 404-410.
- (14) G. Zhai, Y. Liu, L. Lei, J. Wang, Z. Wang, Z. Zheng, P. Wang, H. Cheng, Y. Dai, B. Huang, *ACS Catal.* 2021, **11**, 1988-1994.
